## Review Article

# Biological tuners to reshape the bile acid pool for therapeutic purposes in non-alcoholic fatty liver disease

Justine Gillard and  Isabelle A. Leclercq

Laboratory of Hepato-Gastroenterology, Institute of Experimental and Clinical Research, Université catholique de Louvain, Brussels, Belgium

**Correspondence:** Isabelle A. Leclercq ([isabelle.leclercq@uclouvain.be](mailto:isabelle.leclercq@uclouvain.be))

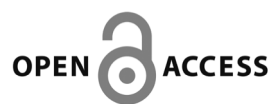

Bile acids synthesized within the hepatocytes are transformed by gut microorganisms and reabsorbed into the portal circulation. During their enterohepatic cycling, bile acids act as signaling molecules by interacting with receptors to regulate pathways involved in many physiological processes. The bile acid pool, composed of a variety of bile acid species, has been shown to be altered in diseases, hence contributing to disease pathogenesis. Thus, understanding the changes in bile acid pool size and composition in pathological processes will help to elaborate effective pharmacological treatments.

Five crucial steps along the enterohepatic cycle shape the bile acid pool size and composition, offering five possible targets for therapeutic intervention. In this review, we provide an insight on the strategies to modulate the bile acid pool, and then we discuss the potential benefits in non-alcoholic fatty liver disease.

## The enterohepatic cycle of bile acids

Most of the bile acids travel along the gut–liver axis in a perpetual cycle with minute proportions that leak into the systemic circulation or are excreted in feces. Five crucial steps along the enterohepatic cycle shape the bile acid pool size and composition (Figure 1).

The transformation of cholesterol into primary bile acids (Figure 2) requires the action of 17 hepatic enzymes involved in two pathways (the classical and the alternative pathways) [1]. The classical pathway producing cholic and chenodeoxycholic acids (CA and CDCA) is initiated by the rate-limiting cholesterol 7 $\alpha$ -hydroxylase (CYP7A1) that converts cholesterol into 7 $\alpha$ -hydroxycholesterol (Figure 3). The latter is further transformed into 7 $\alpha$ -hydroxy-4-cholesten-3-one (called C4, a proxy for bile acid synthesis) by the 3 $\beta$ -hydroxysteroid dehydrogenase (3 $\beta$ -HSD). The sterol 12 $\alpha$ -hydroxylase (CYP8B1) then hydroxylates a proportion of 7 $\alpha$ -hydroxy-4-cholesten-3-one to form CA (Figures 2 and 3). The rest is not hydroxylated by CYP8B1 and forms CDCA (Figures 2 and 3). The alternative pathway converts cholesterol into 27-hydroxycholesterol through the sterol 27-hydroxylase (CYP27A1) and then the oxysterol 7 $\alpha$ -hydroxylase (CYP7B1) hydroxylates it to form CDCA [2]. Some extrahepatic tissues do support the production of oxysterols but the reaction that converts oxysterols into CDCA is restricted to hepatocytes. In physiological conditions, the classical pathway generates 90–95% of bile acids and the alternative pathway 5–10% [3].

Bile acids are conjugated to glycine or taurine under the action of the bile acid-coenzyme A synthase and the bile acid: amino acid transferase [1]. Highly soluble conjugated bile acids are then secreted out of the hepatocytes into the bile by the bile salt export pump (BSEP, Figure 4). Flowing along the bile canaliculi and bile ducts, bile directly reaches the duodenum or fills the gallbladder where it is concentrated and stored. Gallbladder contraction induced by food intake expulses bile into the duodenal lumen to facilitate emulsification, digestion and absorption of lipids.

Received: 21 October 2022  
 Revised: 08 December 2022  
 Accepted: 16 December 2022

Version of Record published:  
 05 January 2023

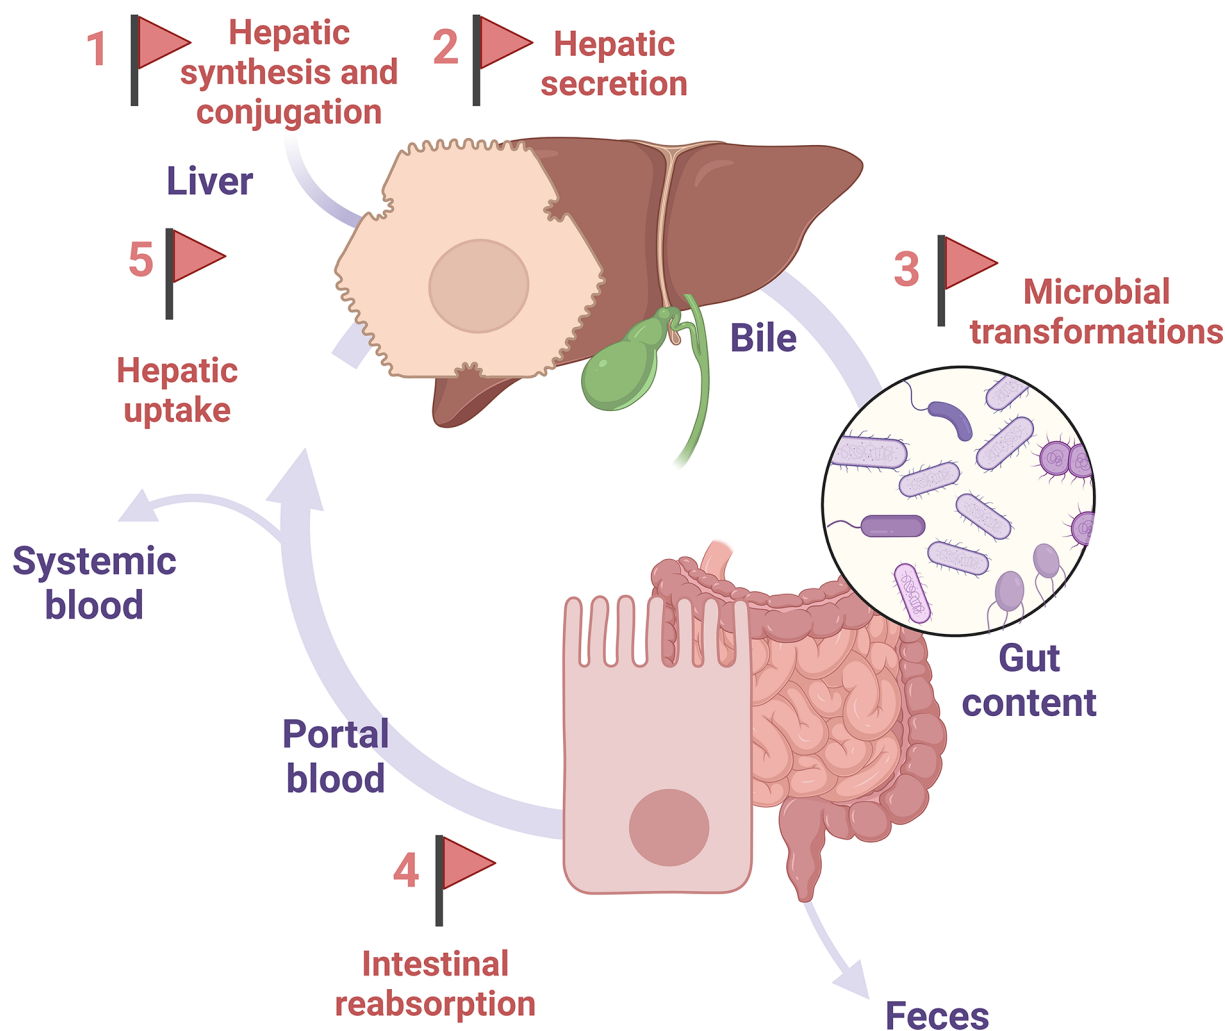

**Figure 1. Five crucial steps along the enterohepatic cycle (represented by the flags) shape the bile acid pool size and composition**

Bile acids travel along the gut-liver axis in a perpetual and efficient cycle, with minute proportions that leak into the systemic circulation or are excreted in feces. In the hepatocytes, primary bile acids are synthesized from cholesterol (Flag 1). After conjugation to taurine or glycine, highly soluble conjugated bile acids are secreted at the biliary pole of the hepatocytes into the bile (Flag 2). Bile acids then reach the gut lumen, where they interact with a wide range of gut microorganisms and undergo transformations by microbial enzymes to yield secondary bile acids (Flag 3). The majority of bile acids are reabsorbed into the portal circulation (Flag 4) that carries them back to the liver where they are recaptured by the hepatocytes (Flag 5). These five steps along the enterohepatic cycle offer five possible targets for therapeutic interventions.

In the intestinal lumen, bile acids interact with a wide range of microorganisms and undergo transformations by microbial enzymes to yield secondary bile acids (Figure 2). After the cleavage of glycine or taurine conjugates by the bile salt hydrolases (BSHs) [4], free CA and CDCA can be respectively converted into deoxycholic and lithocholic acids (DCA and LCA) by the multistep  $7\alpha$ -dehydroxylase reaction. Other microbial enzymes imprint other transformations to bile acids such as oxidation, epimerization or dehydroxylation [5].

Approximately 95% of bile acids present in the gut are reabsorbed into the portal circulation and 5% lost in feces [6]. While free secondary bile acids diffuse across the colonic epithelium, conjugated bile acids are actively reabsorbed through the enterocytes of the terminal ileum. The apical sodium-dependent bile salt transporter (ASBT) takes up bile acids, the fatty acid binding protein 6 (FABP6) delivers them to the basolateral membrane, and the heterodimer organic solute transporter  $\alpha/\beta$  (OST  $\alpha/\beta$ ) is required for transport across the basolateral membrane (Figure 4).

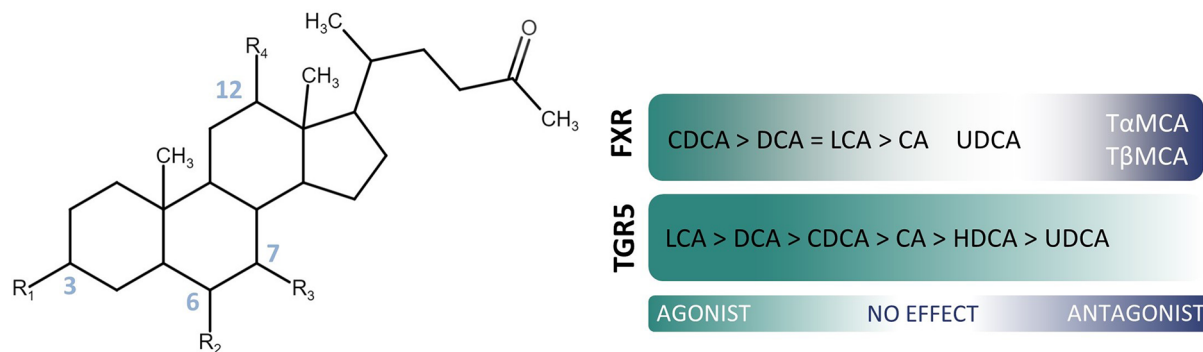

|                       |      | C3 (R1) | C6 (R2) | C7 (R3) | C12 (R4) |
|-----------------------|------|---------|---------|---------|----------|
| Cholic acid           | CA   | OH (α)  | H       | OH (α)  | OH (α)   |
| Chenodeoxycholic acid | CDCA | OH (α)  | H       | OH (α)  | H        |
| Deoxycholic acid      | DCA  | OH (α)  | H       | H       | OH (α)   |
| Lithocholic acid      | LCA  | OH (α)  | H       | H       | H        |
| Ursodeoxycholic acid  | UDCA | OH (α)  | H       | OH (β)  | H        |
| α-muricholic acid     | αMCA | OH (α)  | OH (β)  | OH (α)  | H        |
| β-muricholic acid     | βMCA | OH (α)  | OH (β)  | OH (β)  | H        |
| ω-muricholic acid     | ωMCA | OH (α)  | OH (α)  | OH (β)  | H        |
| Hyocholic acid        | HCA  | OH (α)  | OH (α)  | OH (α)  | H        |
| Hyodeoxycholic acid   | HDCA | OH (α)  | OH (α)  | H       | H        |

**Figure 2. Bile acid structure and activity**

Summary of the main bile acid species, the moieties at C3 (R1), C6 (R2), C7 (R3) and C12 (R4) sites of the sterol backbone, and their agonistic and antagonistic activities for FXR and TGR5. In the table, the main bile acid species in humans are represented in green and the additional murine bile acids in blue.

The portal blood then carries the bile acids back to the liver where they are taken up in the hepatocytes [6]. The sodium taurocholate co-transporting polypeptide (NTCP) captures the conjugated bile acids and the organic anion transporting polypeptide (OATP) isoforms the unconjugated bile acids (Figure 4). This last step completes the effective enterohepatic cycle of bile acids. A small proportion of bile acids (approximately 5%) however escapes hepatic reuptake and spills out in the systemic circulation. In hepatocytes, bile acids from the digestive tract then mix with the newly synthesized ones.

## Mice as an experimental model to study bile acids

Most of the data on bile acids are acquired from murine models. However, the bile acid pools of mice and humans are substantially different (reviewed by Li and Dawson [7] and recapitulated in Figure 2). The murine liver produces primary CA and CDCA as well as ursodeoxycholic acid (UDCA) and further hydroxylates CDCA and UDCA at the C6 position using CYP2C70 to generate α- and β-muricholic acids (α- and β-MCAs), respectively (Figure 2) [8–10]. In turn, α- and β-MCAs are converted by the microbial enzymes to hyodeoxycholic acid (HDCA) and ωMCA. By contrast, CA and CDCA are the main primary bile acids in humans, while MCAs and HDCA are only present at very low concentrations in physiological conditions, as CYP2C70 is not expressed in human liver [7]. Also, bile acids are conjugated to glycine (75%) and to taurine (25%) in humans, while nearly exclusively to taurine in mice [7]. The gut microbial composition (and thus the capacity for bile acid transformation) also differs between humans and mice [11]. As a consequence, the bile acid pool in mice is more hydrophilic and more prone to be actively reabsorbed through bile acid transporters, while intestinal reabsorption in humans rather relies on passive diffusion [7]. Additionally, mouse,

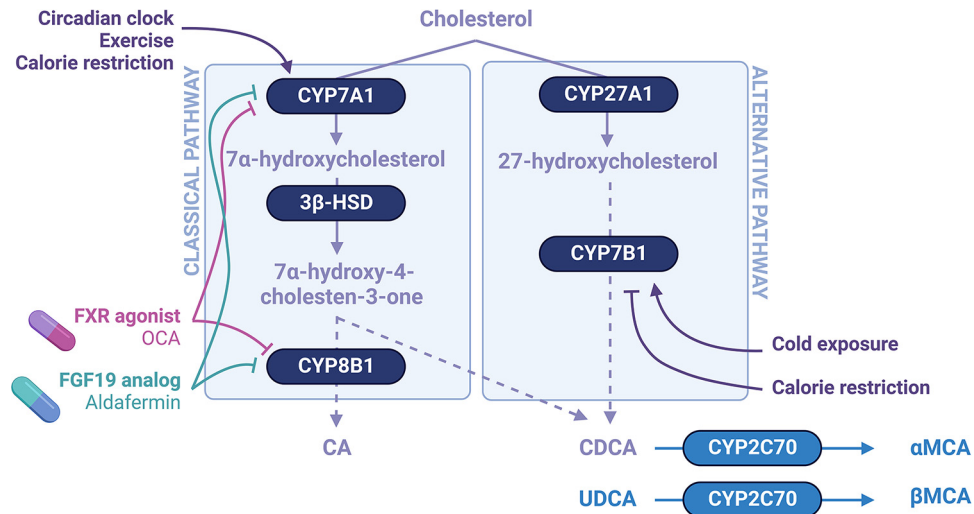

**Figure 3. Bile acid synthesis through the classical and the alternative pathways**

The classical pathway is initiated by the rate-limiting CYP7A1 that converts cholesterol into 7 $\alpha$ -hydroxycholesterol, further transformed into 7 $\alpha$ -hydroxy-4-cholesten-3-one by the 3 $\beta$ -HSD. The CYP8B1 hydroxylates a proportion of 7 $\alpha$ -hydroxy-4-cholesten-3-one to form CA. The rest is not hydroxylated by CYP8B1 and forms CDCA. The alternative pathway converts cholesterol into 27-hydroxycholesterol through the CYP27A1 and then the CYP7B1 hydroxylates it to form CDCA. Mouse but not human livers express CYP2C70 that hydroxylates CDCA and UDCA at the C6 position to generate  $\alpha$ - and  $\beta$ -MCAs, respectively. The classical pathway for bile acid synthesis might be regulated by FXR agonists and FGF19 analogs. Some environmental factors also modulate bile acid synthesis through the classical and the alternative pathways.

but not human, livers express CYP2A12, an enzyme that rehydroxylates secondary bile acids at the C7 position [12]. This means that the mouse liver is able to back-transform secondary into primary bile acids.

CYP2C70 knock-out and CYP2A12/CYP2C70 double knockout mouse models were generated in an attempt to humanize the murine bile acid pool composition [8,12]. Indeed, these mice exhibit a human-like bile acid pool with low concentrations of MCAs [8,12], but the accumulation of CDCA in CYP2C70 and CYP2A12/CYP2C70 knockout mice associates with chronic liver inflammation [8,12,13], questioning the relevance of such models to study liver diseases. Additional ‘humanization’ of the gut microbiota might be required to increase the translational relevance of the model.

## Bile acids in health and NAFLD

The array of bile acid species variably interact with receptors, resulting in diverse (patho)physiological outcomes [14]. Many receptors do accept bile acids as ligands but the nuclear Farnesoid X receptor (FXR) and the membrane Takeda G protein-coupled receptor 5 (TGR5) are specific for bile acids (Figure 2). FXR, expressed in enterocytes and hepatocytes, acts as a bile acid sensor and fine-tunes the bile acid pool size and composition. FXR activates a negative feedback response that represses intracellular bile acid uptake and synthesis, and promotes bile acid secretion. The activation of TGR5 also controls the delivery of bile acids to the gut through the regulation of gallbladder filling and bile flow [15].

Besides, bile acids diversely and competitively engage FXR and TGR5 receptors (Figure 2) to significantly impact on lipid and glucose homeostasis, energy expenditure, inflammation and fibrosis [16–19]. Hence, NAFLD is a disease in which it is anticipated that the modulation of bile acids might become a game changer. Along with gain- and loss-of-function animal models, studies using FXR, TGR5 and dual agonists support a beneficial effect in NAFLD and its dysmetabolic context [17,19,20]. However, agonists agents cause unwanted side effects that limit their clinical use [19,20]. Supplementation in bile acids at supraphysiological doses achieves protection against NAFLD (Table 1) but at the cost of adverse effects. Interestingly, intestinal FXR inhibition has also been reported to protect against glucose intolerance [17].

Table 2 summarizes data on bile acid pool in patients with NAFLD. In systemic blood, total bile acids were found higher in patients with biopsy-proven NAFLD compared with controls in 6/10 reports but unchanged in 3/10. When higher, total bile acids positively correlated with fibrosis severity [21]. Disrupted balance between primary bile acids

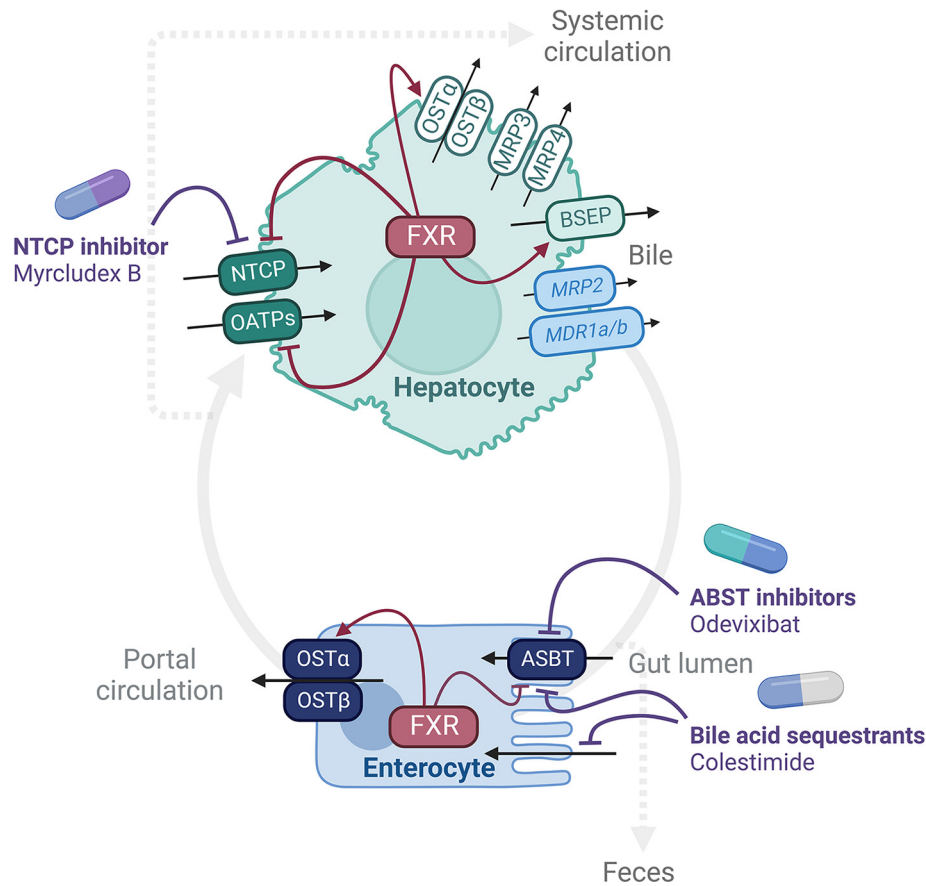

**Figure 4. Bile acid transport in hepatocytes and enterocytes**

Bile acids are exported across the canalicular membrane of the hepatocytes through BSEP. In mice, MDR1a/1b and MRP2 additionally transport bile acids. Basolateral efflux of bile acids into the systemic circulation occurs through OST $\alpha/\beta$ , MRP3 and MRP4. ASBT actively transports bile acids within the enterocytes of the terminal ileum, FABP6 delivers them to the basolateral membrane, and the OST $\alpha/\beta$  heterodimer is required for transport across the membrane. Some bile acids also passively diffuse across the colonic epithelium to reach the portal circulation. The portal blood then carries the bile acids back to the liver where they are taken up in the hepatocytes by NTCP (which recaptures conjugated bile acids) and by OATP isoforms (which recaptures unconjugated bile acids). Bile acid transporters are under the regulation of FXR. Bile acids reabsorption and thus circulation are prevented by bile acid sequestrants and by inhibitors of transporters such as Myrcludex B for NTCP and Odeixibat for ASBT.

**Table 1 Effects of bile acid administration in experimental models of NAFLD**

| Bile acid | Animal model                        | Dose      | Duration  | Administration route | Effects on NAFLD                                              |
|-----------|-------------------------------------|-----------|-----------|----------------------|---------------------------------------------------------------|
| CA        | KK-A <sup>y</sup> mice [36]         | 0.5%      | 8 weeks   | Dietary              | ↘ Hepatic triglycerides                                       |
|           | <i>ob/ob</i> mice [37]              | 0.5%      | 4 weeks   | Dietary              | ↘ Steatosis                                                   |
| DCA       | HFD-fed <i>foz/foz</i> mice [38]    | 0.03%     | 12 weeks  | Dietary              | ↘ Steatosis                                                   |
|           |                                     | 0.1%      | 12 weeks  | Dietary              | ↘ Steatosis, ballooning and macrophage infiltration           |
| UDCA      | <i>ob/ob</i> mice [37]              | 0.5%      | 4 weeks   | Dietary              | ↘ Steatosis                                                   |
|           | HFHC fed-C57BL/6 [39]               | 120 mg/kg | 4 weeks   | Intragastric         | ↘ ALT and AST, unchanged NAS<br>↘ Inflammation and ballooning |
|           | MCD-fed rats [40]                   | 80 mg/kg  | 4 weeks   | Intragastric         | ↘ ALT and AST<br>↘ Steatosis, inflammation and ballooning     |
|           | HFD-fed KK-A <sup>y</sup> mice [41] | 150 mg/kg | 2–3 weeks | Oral gavage          | ↘ Hepatic triglycerides, no effect on histology               |

Abbreviations: HFD, high-fat diet; HFHC, high-fat high-cholesterol diet; MCD, methionine-/choline-deficient diet. Doses are expressed as bile acid concentration in the diet (w/w) or as daily dose in milligram per kilogram of body weight.

**Table 2 Studies reporting alterations of the bile acid pool size and composition in biopsy-proven NAFLD patients**

| Sampling site | Groups                   | Total bile acids                            | Bile acid composition                                                                                                                                                       |                                                                                                                                                                                                                                                                                                                                                                                                                                                                                                                                                                                                                                       |
|---------------|--------------------------|---------------------------------------------|-----------------------------------------------------------------------------------------------------------------------------------------------------------------------------|---------------------------------------------------------------------------------------------------------------------------------------------------------------------------------------------------------------------------------------------------------------------------------------------------------------------------------------------------------------------------------------------------------------------------------------------------------------------------------------------------------------------------------------------------------------------------------------------------------------------------------------|
| Liver         | NASH vs HC               | Higher [21]                                 | Higher (T)CA, (G)CDCA and (T)DCA [21,22]<br>Lower CA and GDCA [22]<br>Higher conjugated CDCA/MCA ratio [23]                                                                 |                                                                                                                                                                                                                                                                                                                                                                                                                                                                                                                                                                                                                                       |
|               | NASH vs steatosis        | Not available                               | Higher TDCA [22]<br>Lower GDCA [22]                                                                                                                                         |                                                                                                                                                                                                                                                                                                                                                                                                                                                                                                                                                                                                                                       |
|               | Systemic plasma or serum | Steatosis vs HC                             | Higher [23]                                                                                                                                                                 | Higher TCA [24]<br>No change [23]                                                                                                                                                                                                                                                                                                                                                                                                                                                                                                                                                                                                     |
|               |                          | NASH vs HC                                  | Higher [25–30] or unchanged [15,23,31]                                                                                                                                      | Higher total primary BA [23,29,30,32]<br>Lower total secondary BA [23,28,32] or higher total secondary BA [29,30]<br>Higher total conjugated BA [25,28–30,32]<br>Lower total unconjugated [15]<br>Lower taurine to glycine conjugated BA ratio [28]<br>Higher (G/T)CA, (G/T)CDCA, (G/T)UDCA and (G/T)DCA [23,24,27–30,32,33] and GHCA, HDCA, 3-oxo-DCA, iso-DCA [29]<br>Lower LCA, 7-oxo-DCA [29], MCA [23], CA and DCA [15]<br>Conjugated CDCA/MCA ratio positively correlated to steatosis, inflammation and ballooning [23]<br>7-oxo-DCA and 7-oxo-LCA positively correlate to NASH severity and ballooning [29]<br>No change [31] |
| Feces         | NASH vs steatosis        | Unchanged [15,23]                           | Lower total unconjugated BA [15]<br>Higher total primary BA [23,32]<br>Lower (G/T)CA, (G/T)DCA [15] and $\beta$ MCA [23]<br>Higher (G/T)CA and (G/T)UDCA [32]               |                                                                                                                                                                                                                                                                                                                                                                                                                                                                                                                                                                                                                                       |
|               | Fibrosis vs no fibrosis  | Positively correlate to fibrosis [15]       | Higher total primary BA [15]<br>Lower unconjugated BA [15]<br>Lower secondary/primary BA ratios [32,34]<br>Conjugated CDCA/MCA ratio positively correlates to fibrosis [23] |                                                                                                                                                                                                                                                                                                                                                                                                                                                                                                                                                                                                                                       |
|               | Steatosis vs HC          | Unchanged [26]                              | Higher CA [26]                                                                                                                                                              |                                                                                                                                                                                                                                                                                                                                                                                                                                                                                                                                                                                                                                       |
|               | NASH vs HC               | Higher [26]                                 | Higher CA, CDCA [26]<br>Lower LCA [26]                                                                                                                                      |                                                                                                                                                                                                                                                                                                                                                                                                                                                                                                                                                                                                                                       |
| Feces         | NASH vs steatosis        | Unchanged [26]                              | Higher GLCA and TLCA [26]                                                                                                                                                   |                                                                                                                                                                                                                                                                                                                                                                                                                                                                                                                                                                                                                                       |
|               | Fibrosis vs no fibrosis  | Higher in non-obese and lower in obese [35] | Higher CA, (G)CDCA, (G)UDCA in non-obese [35]<br>Lower LCA and DCA in non-obese [35]<br>Higher LCA and DCA in obese [35]                                                    |                                                                                                                                                                                                                                                                                                                                                                                                                                                                                                                                                                                                                                       |

Abbreviation: HC, healthy control.

(reflecting hepatic synthesis) and secondary bile acids (reflecting transformation by gut microbes) is a repeated finding, though the direction of the disturbance is inconstant. Different experimental conditions such as sampling site and timing, patients and controls characteristics, and methodology for bile acid analysis do not allow to define a bile acid signature in NAFLD patients.

## Strategies to modulate the bile acid pool

Rather than bile acid supplementation or treatment with agonist or antagonist of bile acid receptors, tuning each of the determinant steps of the enterohepatic cycle (flags in Figure 1) might reshape the bile acid pool for therapeutic purposes.

### Flag 1: hepatic synthesis of bile acids

In hepatocytes, the bile acids taken up from the portal circulation add up to the newly synthesized ones. The resulting bile acid pool activates FXR, leading *in fine* to the repression of enzymes involved in bile acid synthesis (Figure 3). The dimerization of the FXR target small heterodimer protein (SHP) with transcription factors such as the liver receptor homolog 1 and the hepatocyte nuclear factor-4 $\alpha$  represses the expression of CYP7A1 and CYP8B1 [22–24]. In ileal

enterocytes, the absorbed bile acids control the release of fibroblast growth factor 19 (FGF19 or FGF15, the murine ortholog) into the portal circulation, which upon binding to the hepatic FGFR4- $\beta$ Klotho complex represses hepatic CYP7A1 [24–27]. Thereby, FXR finely adjusts the bile acid synthesis in relation to the bile acid load entering the portal circulation.

The deletion of CYP7A1, the rate-limiting enzyme of the classical pathway for bile acid synthesis, reduces the bile acid pool size and up-regulates the enzymes of the alternative pathway [28]. This shifts the proportions of bile acids produced to a lower proportion of TCA and a higher proportion of T $\beta$ MCA [28], as most of the CDCA synthesized through the alternative pathway is further converted into  $\beta$ MCA in mice (Figure 3). In the CYP7A1/CYP27A1 double knockout model, the bile acid pool size is drastically reduced but its composition remains unchanged [29]. This illustrates that hepatic bile acid synthesis determines in a large part the bile acid pool size and composition. FXR agonists and FGF19 analogs are thus perfect candidates to modulate bile acid synthesis (Figure 3).

Pharmacological FXR agonists, being bile acid analogs (obeticholic acid, OCA) or non-steroidal compounds, inhibit bile acid synthesis by acting at the hepatic and intestinal levels [22,25,30–36]. The demonstration that FXR agonists PX-102 in healthy subjects [32] or MET409 and Cilofexor in NASH patients [35,36] reduce bile acid synthesis, with no significant increase in circulating FGF19 concentration, indicates that the activation of hepatic FXR might inhibit bile acid synthesis independently of FGF19. On the contrary, the bile acid analog OCA dose-dependently increases FGF19 concentrations and, in parallel, decreases C4 concentrations in systemic blood of NAFLD subjects [33], suggesting a FGF19-dependent inhibition of bile acid synthesis. Fexaramine, a gut-restricted FXR agonist that does not activate hepatic FXR induces FGF15 production and portal secretion in mice with variable effect on hepatic bile acid synthesis and pool according to the studies [37–40]. Aldafermin (NGM282), a non-tumorigenic engineered analog of the gut hormone FGF19, suppresses the expression of CYP7A1 and CYP8B1 in mice [41,42] and hence, depletes the bile acid pool. The bile acid production relies mainly on the alternative pathway resulting in a bile acid pool mainly composed of T $\beta$ MCA [41]. In NASH subjects, Aldafermin dose-dependently reduces total bile acids [43–45] and the proportion of 12 $\alpha$ -hydroxylated bile acids in serum, signing the inhibition of the CYP8B1-dependent classical pathway [44].

The strategies to modulate the alternative pathway are less characterized. The rate-limiting step of the alternative pathway is the cholesterol being transported through the inner mitochondrial membrane by steroidogenic acute regulatory protein 1 (StarD1) [46]. Oxysterols generated by CYP27A1 activate liver X receptor and up-regulate StarD1 [2]. The balance between the classical and the alternative pathways might be influenced by environmental factors, as it will be discussed below. The promotion of the alternative pathway at the expense of the classical pathway would yield to intrahepatic accumulation of toxic oxysterols in humans, and/or to a more FXR-antagonistic T $\alpha$ / $\beta$ MCA-rich bile acid pool in mice.

## Flag 2: hepatic secretion of bile acids

BSEP is a major player for hepatocyte bile acid secretion (Figure 4). When absent or not functional, severe cholestasis occurs in humans. In mice, cholestasis is milder, as mouse hydrophilic tetra (3 $\alpha$ -, 6 $\alpha$ -, 7 $\alpha$ - and 12 $\alpha$ -) hydroxylated bile acids (Figure 2) are also excreted through the multidrug resistance protein 1a et 1b (MDR1a/1b) and the multidrug resistance associated-protein 2 (MRP2) [47–49]. While low in normal conditions, basolateral bile acid efflux through OST $\alpha$ / $\beta$ , MRP3 and MRP4 increases upon cholestasis causing bile acid spill over into the systemic blood [6]. Alternatively, a proportion of the bile acids secreted in bile canaliculi are taken up by the cholangiocytes that express ASBT and OST $\alpha$ / $\beta$  to return back to the hepatocytes; a process called the cholehepatic shunting that enhances bile secretion and flow [6].

The bile acid transporters in hepatocytes and enterocytes are under the regulation of FXR (Figure 4) [50]. FXR activation launches a coordinate response to increase export (BSEP, OST $\alpha$ / $\beta$ ) and reduce import (NTCP, OATPs), and inhibit bile acid synthesis to protect the cells and the organism from bile acid overload. It will therefore be tempting to propose that increasing BSEP efficiency might confer hepatoprotection against raised bile acids.

## Flag 3: gut microbial transformations of bile acids

The complex community of microorganisms living in the gut interacts with bile acids [5,51]. The microbial conversion of primary bile acids into secondary bile acids is a key determinant of the bile acid pool composition (Figure 1). Germ-free mice have a poorly diverse bile acid pool only made of conjugated primary bile acids [52–54]. Similarly, treatment with antibiotics leads to depletion of secondary bile acids [53,54].

Bile salt hydrolase genes are widely distributed and highly abundant in gut bacterial and archaeal species [4,55]. Different BSH sequences yield enzymes with variable activities (optimum pH, substrate specificity) but all support

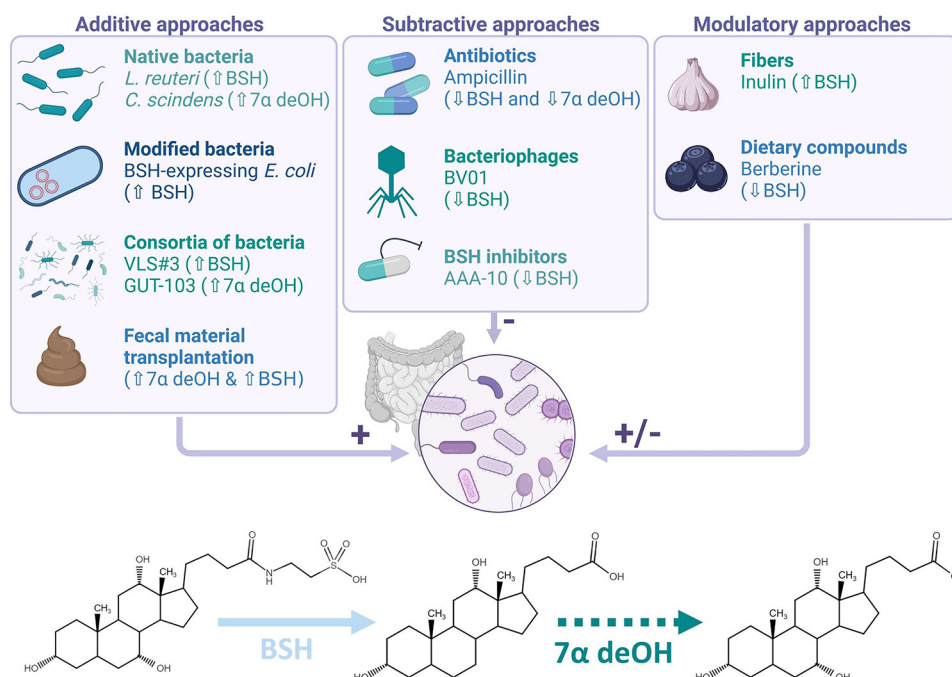

**Figure 5. Different microbiota-based approaches to modulate the bile acid pool**

For each strategy, one example and its impact on the bile acid metabolism are mentioned. The BSH removes the glycine or the taurine from the primary bile acid (TCA represented) and allows the further conversion through the multistep 7 $\alpha$ -dehydroxylation (7 $\alpha$  deOH) into the secondary bile acid (DCA represented).

the same reaction: the hydrolysis of the glycine or taurine moieties (Figure 5) [51,55,56]. Deconjugation by BSHs is a gateway step for subsequent transformations, amongst which dehydroxylation of unconjugated primary bile acids by the 7 $\alpha$ -dehydroxylase is the most impactful on the bile acid pool composition [57]. This transformation converts CA into DCA and CDCA into LCA (Figure 5). Conversely to BSH activity, the 7 $\alpha$ -dehydroxylation is a multistep enzymatic process carried by a small subset of low abundance bacterial strains [5]. Among the characterized strains are *Clostridium scindens* ATCC 35704 and VPI 12708, *Clostridium hylemonae* TN271, *Clostridium hiranonis* TO931, *Clostridium sordelii* VPI 9048, *Clostridium Leptum* VPI 10900 and *Extibacter muris* (exclusively in mice) [58,59], which are estimated to account for one millionth of the gut microbes in humans [57]. The bile acid inducible (*bai*) operon was characterized in *C. scindens* VPI 12708, in which the 7 $\alpha$ -dehydroxylase activity is induced by CA [59]. The *bai* operon contains 8 genes coding for 7 enzymes (*baiB*, *baiCD*, *baiE*, *baiA2*, *baiF*, *baiH* and *baiI*) and one transporter (*baiG*) [57]. Recently, it has been shown that *Bacteroides vulgatus*, *Bifidobacterium adolescentis* and *Roseburia intestinalis* support CA 7 $\alpha$ -dehydroxylation *in vitro* [60]. Apart from 7 $\alpha$ -dehydroxylation, other transformations such as oxidation or epimerization further increase the diversity of the bile acid species. In humans, UDCA is formed through epimerization of CDCA by the gut bacteria and not synthesized in the liver as in mice. Besides, various bacteria are capable of generating bile acid isoforms such as iso-, 3-oxo-, allo-, 3-oxoallo- and isoallo-LCA and DCA [57,61–66]. Also, a microbial re-conjugation to leucine, phenylalanine and tyrosine has been described [67]. This is an outline of the main modifications of bile acids by microbial enzymes; however, given the diversity of the gut microbial organisms, their isolated or synergistic activities, the number of sites on the sterol backbone available for modification and the variety of possible moieties, the potential diversity of the bile acid species is almost boundless. It is therefore of great interest to understand the impact on health of a change in bile acid metabolism in the gut, and thus in bile acid diversity.

### Additive approaches

The administration of probiotics increases BSH activity [68,69]. Indeed, administration of *Lactobacillus acidophilus* and *Lactobacillus gasseri* with a high BSH activity to germ-free mice augmented the concentration of free bile acids [56]. Similar results were obtained in germ-free and conventionally raised mice with an engineered *Escherichia coli* in which BSH bacterial enzymes from *Lactobacillus salivarius* JCM1046 and *L. salivarius* UCC118 have been cloned



[70]. Russel et al. even achieved a lifetime stable gut colonization in conventionally raised mice after a single administration of a native *E. coli* genetically modified to express a BSH [71]. Strikingly, three months after the single administration, secondary bile acids were higher and primary bile acids lower in feces of treated mice, reflecting the conversion of primary deconjugated bile acids into secondary bile acids [71]. Similar results were obtained with VSL#3, a probiotic mix containing *Lactobacillus*, *Bifidobacterium* and *Streptococcus* strains [72,73]. As a result of a low proportion of conjugated bile acids, the ileal active reabsorption of bile acids and production of FGF15 were reduced, thereby increasing fecal excretion and hepatic synthesis of bile acids [73]. In humans, microencapsulated *Lactobacillus reuteri* NCIMB 30242 (and even more if encapsulated in a delayed release capsule [74]) increased the intraluminal BSH activity and plasma concentrations of free bile acids, supporting efficient reabsorption of free bile acids [75,76]. Similar results were observed in obese subjects using *Bacillus subtilis* R0179 or *Bifidobacterium animalis subsp. lactis* B94 [69,77].

The administration of *Clostridium scindens* which has a high 7 $\alpha$ -dehydroxylase activity [78] increases the concentrations of DCA and LCA in antibiotics-treated [79,80], in gnotobiotic (i.e. germ-free mice colonized with few identified bacterial strains) [81,82] and in specific pathogen free mice [81]. Similarly, the colonization of gnotobiotic mice by *Extibacter muris* increases the proportion of secondary bile acids, without changing the bile acid pool size [58]. Because the 7 $\alpha$ -dehydroxylation of primary bile acids is a multistep pathway, the transfer of the *bai* operon in a chassis is more complex than for BSH. The colonization of germ-free mice with an engineered *Clostridium sporogenes* in which the enzymes determined as necessary and sufficient to carry out the 7 $\alpha$ -dehydroxylation were cloned, led to the production of DCA, although substantially less than in mice colonized with *C. scindens* [57]. The colonization of a reduced-community gnotobiotic model with GUT-103, a consortium of 17 bacterial strains that includes *C. scindens*, was shown to increase deconjugation and the conversion of primary into secondary bile acids [83]. A another study showed that treatment with a consortium of four bacteria containing *C. scindens* was not more effective to modify the luminal concentration of DCA than *C. scindens* alone in antibiotics-treated mice [79]. In the context of *Clostridium difficile* infection, the administration of a consortium of five *Lactobacilli* and two *Bifidobacterium* strains to mice reduced the primary bile acids and increased the secondary bile acids in feces [84]. A combination of *C. scindens* and an engineered isoDCA-producing *Bacteroides fragilis* or *Bacteroides ovatus* was also used to induce the conversion of CA into DCA and then into isoDCA in germ-free mice [64].

The fecal bile acid pool of patients with recurrent *C. difficile* infection is characterized by nearly undetectable secondary bile acids, which in normal conditions limit the growth of the pathological strain [85–88]. In that particular context, fecal material transplantation (FMT) from healthy donors allows the expansion of bacteria with BSH and 7 $\alpha$ -dehydroxylase activities [60] and increases the BSH genes and the metagenomic-predicted BSH and 7 $\alpha$ -dehydroxylase activities [87]. As a result, the FMT increased the secondary bile acids DCA, LCA and isoDCA [88] and decreased TCA [87], to yield a bile acid pool similar to that of healthy donors. This has been confirmed by other studies [85–87]. Similar though less marked results were also obtained after oral administration of capsules containing freeze-dried donor fecal microbiota [89].

To summarize, these studies illustrate that adding one or more bacteria—either native or modified—effectively affects diverse microbial bile acid-metabolizing activities and consequently the bile acid pool. Additional studies are required to assess the effects on the bile acid pool in the pathophysiological contexts.

## Subtractive approaches

In mice treated with antibiotics, deconjugation being suppressed, the bile acid pool is mainly composed of TCA and T $\beta$ MCA [53,54,90]. The bile acid pool size is large because T $\beta$ MCA, a potent FXR antagonist, maintains unrestrained bile acid synthesis [53,91]. In humans, antibiotic treatment drastically increases the proportion of CA without changing the total bile acids in feces [92,93].

Bacteriophages alter the abundance and activity of their bacterial host and thus modulate the gut microbiota in a more specific manner than antibiotics. The *Bacteroides* phage BV01 was shown to repress the tryptophan-rich sensory protein in *Bacteroides vulgatus* ATCC 8482 which, via an unknown mechanism, repressed bile acid deconjugation [94].

Inhibitors of bile acid deconjugation have been developed [95,96]. In conventionally raised mice, the pan-BSH inhibitors (AAA-2 and AAA-10) reduced the BSH activity and shifted the intestinal bile acid pool towards predominantly conjugated bile acids [95,96]. As further 7 $\alpha$ -dehydroxylation relies on initial deconjugation, the concentrations of the secondary DCA and LCA were also reduced by the treatment with BSH inhibitors [95,96]. Similar to changes observed with antibiotics [53], the T $\beta$ MCA concentration was higher in treated-mice, stimulating hepatic bile acid synthesis through CYP7A1 and increasing the concentrations of total and conjugated primary bile acids in intestinal

content [95]. The circulating bile acid species and the gut microbial composition were not significantly modified by the treatment with AAA-10 [95].

Conversely to the additive approaches, the subtractive approaches mainly target the BSH activity and thus the deconjugation of bile acids from taurine or glycine. Antibiotics also significantly modulate the bile acid pool but at the cost of changing many others parameters. Their use is thereby complex for improving the understanding the impact of a change in microbial bile acid metabolism on health and diseases.

### Modulatory approaches

A subtler but no less effective strategy to modify the gut microbiota is through modulatory approaches by prebiotics or dietary compounds [97,98]. Consumption of oligo-fructose enriched inulin increased the abundance of *Bifidobacterium* species and of *C. scindens* (7 $\alpha$ -dehydroxylase activity) and decreased the abundance of *Bacteroides vulgatus* (BSH activity and putative 7 $\alpha$ -dehydroxylase activity), but had no effect on the fecal bile acid pool in overweight children [99]. By changing gut microbial structure and function, oligofructose increased the conversion of primary T $\beta$ MCA into  $\omega$ MCA, HDCA and HCA, without changing the total bile acid concentration in portal blood of mice [100]. *In vitro*, the BSH activity of *Lactobacillus acidophilus* NCTC 1723 increased when incubated with inulin, while it decreased with lactulose or lactobionic acid [101], indicating that prebiotics can alter the capacity of microorganisms to deconjugate bile acids *in vitro*, but further studies are required to assess the effects *in vivo*.

In mice, berberine elevated total bile acids in feces [102–105]. While some studies showed that berberine did not affect the circulating and hepatic bile acid profiles [102], other reported that it elevated conjugated and primary bile acids [103–105] and reduced secondary bile acids [104]. Berberine changed the microbial community function and particularly, lowered the BSH activity [102,104,106]. Soybean protein also changed the gut microbiota composition and the caecal bile acid pool to higher proportion of secondary bile acids, without affecting fecal bile acid loss [107]. By inducing the expansion of *Bifidobacteria* and *Lactobacillus* genera, phenolic blueberry extract lowered the ratio of primary to secondary bile acids that was elevated by a HFD [108]. A component of Pu-erh tea, theabrownin also modulated the bile acid pool size and composition through suppression of microbes of the *Bacillus*, *Streptococcus*, *Clostridium* and *Bacteroides* genera that have a BSH activity and activation of the alternative bile acid synthetic pathway in mice and humans [109].

By affecting the gut microbial structure and function, modulatory approaches that include the use of prebiotics and dietary compounds also impact the metabolism, the composition and the signaling of bile acids. Nevertheless, the impact of these modulations on host physiology remains currently elusive and poorly characterized.

All these emphasize that the interactions between the food, the gut microorganisms and the bile acids produced by the host are essential and have a crucial role in shaping the bile acid pool. Thus, adjusting the composition and/or function of the microbial communities that inhabit our gut has a real influence on the bile acid pool size and composition. It is worth noting that the results were mostly obtained in preclinical studies and in reduced models such as gnotobiotic or antibiotic treated animals, representing an important limitation of the translation and the application to humans.

### Flag 4: intestinal reabsorption of bile acids

The reabsorption of bile acids from the gut lumen into the portal circulation occurs through passive diffusion or active transport that requires transporters (Figure 4) [6]. The importance of ABST as a gate for the recapture of bile acids into the portal circulation has been demonstrated using ABST knockout models [7]. ABST favors the transport of glycine and taurine conjugated bile acids over unconjugated bile acids [6]. When ABST is absent or inhibited, bile acids remain in the intestinal lumen and are more likely to undergo microbial transformations, promoting their reabsorption through passive diffusion for the most hydrophobic ones or their excretion in feces.

Hence, ABST inhibitor SC-435 and others increased fecal bile acid loss [110,111] and stimulated the classical pathway for hepatic bile acid synthesis through the FXR-FGF15 pathway, which caused relative reduction of MCAs [112]. Thus, ASBT inhibition renders the bile acid pool more hydrophobic. In humans, the inhibition of ABST by volixibat (SHP626), linerixibat (GSK2330672) or odevixibat (A4250) also increases fecal bile acid excretion and hepatic bile acid synthesis, hence decreasing the proportion of secondary bile acids [113–116]. The inhibition of OST $\alpha$ -OST $\beta$  by clofazimine concentrates bile acids in the enterocytes, leading to the activation of intestinal FXR, with no effect on the composition or size of the bile acid pool [117].

Bile acid sequestrants cholestyramine, colestimide or colesevelam are ion exchange resins that capture bile acids in the gut, preventing their reabsorption into the enterohepatic circulation and promoting fecal excretion [118]. The lower FXR-FGF15-SHP negative feedback then induces the synthesis of bile acids and lowers cholesterol in the liver [119–121].

ASBT inhibitors and bile acid sequestrants limit the absorption of bile acids into the portal circulation. Conversely, the overexpression of ASBT, OST $\alpha$  and/or OST $\beta$  could result in the opposite outcome, i.e. increased bile acid enterohepatic recycling. Such approaches have not yet been tried by fear of hypercholesterolemia and/or hypercholanemia.

While conjugated bile acids are preferentially actively reabsorbed, unconjugated bile acids diffuse across cell membranes into the portal circulation according to their hydrophobicity [6]. Factors that affect the hydrophobicity are conjugation (e.g. to taurine and glycine) and the number of hydroxyl groups (Figure 2). Conjugation, deconjugation and other biotransformations by gut microorganisms (see Flag 3) can thereby significantly impact bile acid reabsorption. To illustrate, high BSH activity associates with high concentration of free bile acids in systemic blood, reflecting a high reabsorption [74–76]; while low BSH activity associates with elevated fecal bile acid loss [95,96,102]. Thus, changing the hydrophobicity of the bile acid pool by targeting the gut microbiota might increase or decrease passive bile acid flux across the intestinal epithelium.

## Flag 5: hepatic uptake of bile acids

The capture of bile acids in the hepatocytes through basolateral transporters, NTCP and OATPs, completes the enterohepatic bile acid cycle (Figures 1 and 4). NTCP preferentially captures conjugated bile acids and members of the OATP family unconjugated bile acids [122]. Subjects lacking NTCP and those treated with the NTCP inhibitor Myrcludex B have hypercholanemia [122–125]. In NTCP knockout mice, the phenotype is milder as conjugated bile acids are additionally transported in the hepatocytes by OATP1A1 and OATP1B2 [126–128]. This is also supported by the inhibition of the re-uptake of bile acids by Myrcludex B in OATP1A/1B knockout but not in WT mice [128–130].

As for intestinal bile acid reabsorption, strategies to increase bile acid capture by the hepatocytes might yield to a condensed enterohepatic bile acid pool due to enhanced bile acid signaling in the liver. Such an approach is of interest, as the combined activation of the bile acid-activated receptors TGR5 and FXR has been reported as protective against NASH progression [31,131–135].

## Environmental factors

The bile acid pool constantly changes according to time and location along the enterohepatic cycle [136], identified as flags in Figure 1. The diet, biological clock, temperature, physical exercise, health status and genetics further confer a spatiotemporal bile acid signature to each individual. Here, we illustrate how some of these variables affect one or more flag(s) and how they might be tuned to reshape the bile acid pool.

Food products and dietary patterns modulate structural variants in the genome of gut bacteria, hence the bile acid pool [137]. High-fat and high-sucrose diet (HFHS) strikingly increases total bile acids and the proportion of conjugated primary bile acids in systemic blood and feces, through a modulation of the gut microbial communities and a reduction of the microbial BSH activity [138]. The concentration of the FXR antagonist T $\beta$ MCA is elevated in HFHS-fed mice, resulting in enhanced hepatic bile acid synthesis through CYP7A1 [138]. Already high fat diet alone markedly alters the gut microbiota composition: it lowers the BSH gene expression [139] and increases the bile acid pool size and the concentration of T $\beta$ MCA [140,141]. This was, however, not seen in animals fed a high fat, cholesterol and fructose diet [142,143]. In humans, a meat based-diet remodels the gut microbial communities and their metabolizing activities, already after a short period of time, with increased expression of microbial BSH and fecal concentration of secondary and of total bile acids [144]. Similarly, the circulating total, primary and glycine-conjugated bile acids are higher, while the fecal total, secondary and conjugated bile acids are lower in vegans compared with omnivorous [145]. This is just to cite a few of the reports supporting that dietary components shape bile acids by changing the gut microbiota [146–149].

Caloric restriction remodels the gut microbiota composition to lower BSH expression [139], resulting in reduced liver total bile acid concentrations in mice [139,150]. The resulting up-regulation of the classical pathway and repression of the alternative pathway for bile acid synthesis elevates the proportion of 12 $\alpha$ -hydroxylated bile acids [139,150]. In humans, low caloric diets to obese subjects restructures the gut microbial community that associates with reduced total bile acids in systemic blood and feces [151–153].

In addition to being regulated by meals and synchronized by vesicular emptying, bile acids are dependent on the biological clock. CYP7A1 expression is regulated by the clock genes REV-ERB $\alpha$  and DBP [154,155] and FXR and SHP expressions have a circadian rhythm [156]. The expression of KLF15 in ileum cyclically inhibits the expression of FGF15 [157]. Short-term sleep disruption alters bile acid metabolism by suppressing clock genes as well as CYP7A1 in mice [158]. As a consequence, total bile acids are reduced in the liver and intestine of mice submitted to sleep disruption [158]. Similarly, chronic disruption of the circadian rhythm increased fecal CA and TCA, and decreased the gut microbial  $\alpha$ -diversity in rats [159].

Comparing to thermoneutrality-housing [160], cold exposure stimulates bile acid synthesis through induction of CYP7A1 [161], CYP8B1, CYP7B1 and CYP27A1 [162,163]. This is accompanied by changes in the microbiota composition and functionality [162]. While Worthmann et al. reported a higher BSH activity [162], Zietak et al. hypothesized that the lower abundance of *Lactobacillus* after cold exposure contributes to the higher concentration of conjugated bile acids [162], as the members of the *Lactobacillus* genus have a high BSH capacity [164]. The higher levels of conjugated bile acids [163], such as T $\alpha$ - and T $\beta$ -MCAs that are FXR antagonists, would inhibit FXR signaling, increase the expression of enzymes for bile acid synthesis and consequently increase the bile acid pool size.

Physical activity changes the bile acid pool size and composition. Endurance exercise boosts fecal excretion and biliary secretion of bile acids in mice [165], with an even more pronounced effect in hypercholesterolemic mice [166]. The bile acid transporters OST $\alpha$  and OST $\beta$  in ileum and NTCP in liver are down-regulated in running versus sedentary animals [165], indicating a reduced bile acid reabsorption. Although the gene expression of CYP7A1, CYP8B1 and CYP27A1 is not affected by exercise in that study [165], CYP7A1 is up-regulated in trained mice in comparison to sedentary mice in another study [167]. In humans, circulating FGF19 and total bile acids are reduced after resistance exercise, while unchanged by endurance exercise [168].

## Application to NAFLD therapeutics

This section explores the biological tuning of bile acids along the enterohepatic cycle for therapeutic purposes in NAFLD.

Most studies report CYP7A1 up-regulation in NASH livers [169–171]. By contrast, the expressions of CYP8B1, CYP7B1 and CYP27A1 are uncertain [169–173]. StarD1 that mediates the trafficking of cholesterol for bile acid synthesis through the alternative pathway is up-regulated in NASH livers [46,174]. Overall, the data suggest a higher bile acid synthesis in NASH, although the total bile acid concentration was reported high in some [170,175–179] but not all the studies [21,169,171] (Table 2).

As bile acids are the main regulators of their own synthesis, detangling the cause and the consequence of bile acid perturbations observed in NAFLD is almost impossible. Nevertheless, FXR agonists and FGF19 analogs that target and dampen the classical pathway for bile acid synthesis have been quite uniformly reported to reduce liver fat content, NAFLD severity assessed by the NAFLD activity score and/or fibrosis in patients with NAFLD, even if often at the expense of negative side effects such as pruritus and higher atherosclerotic risk [20,35,45,180,181]. The beneficial effects cannot solely be attributed to indirect changes in the bile acid pool as FXR activation has numerous direct effects notably on glucose and lipid homeostasis, inflammation and fibrosis [17,19,24].

Advanced stages of NAFLD are sometimes associated with high hepatic bile acid levels (Table 2) [182]. Hence, boosting bile acid export out of the hepatocytes might confer hepatoprotection. This has however not been tested.

Targeting the gut microbiota and its functionality in NAFLD subjects is attractive, as gut dysbiosis contributes to NAFLD [183], with microbiome signatures being associated with the severity of NAFLD and associated fibrosis [184,185].

The administration of bacterial strains (either native or genetically modified), prebiotics and cold exposure have been shown to increase the BSH activity, the fecal excretion of unconjugated bile acids and the hepatic synthesis of bile acids from cholesterol. Higher BSH activity is thus logically accompanied by a reduction of cholesterolemia in different clinical studies on healthy and hypercholesterolemic subjects [75,76]. Cholesterol being a major contributor of lipotoxicity that drives NAFLD pathogenesis [186], increasing BSH activity might be effective in preventing NAFLD development. In mice, higher BSH activity and subsequent changes in bile acid pool are associated to reduced weight gain and liver triglycerides [70] and to improved glucose tolerance in both lean and obese mice [71]. By contrast, treatment with antibiotics, bacteriophage or BSH inhibitors and modification of the diet in terms of composition and of caloric load have been described to reduce the BSH activity. The inhibition of BSH by AAA-10 increased the abundance of conjugated bile acids in the gut, thereby preventing intestinal permeability and the subsequent development of steatohepatitis [187].

Currently, the impact of the elevation of specific bile acid species on NAFLD remains globally ignored. HCA and HDCA increase TGR5 activation, promote GLP-1 secretion and improve glucose tolerance and insulin sensitivity [100,188]. The administration of oligofructose elevates the concentration of HCA and HDCA in mice [100], but whether this contributes to oligofructose benefit is unknown. The administration of DCA protects from NASH [131]. Boosting the endogenous production of DCA such as shown in mice by the administration of *Ruminococcus bromii* [185] might represent a therapeutic opportunity, not yet explored.

Dietary compounds also alleviate NAFLD, in a bile acid-dependent manner. In mice, camu camu protects from weight gain, fat accumulation and hepatic steatosis development [138], and berberine as well as silybin prevent from

hepatic steatosis [103,189] and NASH [105]. The replacement of dairy protein in the regular HFD by soybean protein reduces weight gain and attenuates hepatic steatosis [107]. Rebalancing the bile acid pool through blueberry extract improves the metabolic syndrome [108]. Nevertheless, the impact of these modulations of the microbiota and consequently of the bile acid pool on NAFLD in humans remains elusive at the present time, and further investigations are then required.

Blocking the intestinal bile acid reabsorption by ASBT inhibitors and bile acid sequestrants leads to fecal bile acid excretion and subsequent cholesterol consumption to replenish the bile acid pool [112]. The inhibition of ASBT has been demonstrated to be beneficial for the treatment of NAFLD and associated dysmetabolism, as ASBT inhibitors lower hepatic and circulating cholesterol levels, improve glucose tolerance [110–112] and alleviate NAFLD severity in animals [112]. In humans, the ASBT inhibitor linerixibat reduces fasting glycemia, insulinemia and improves glucose tolerance in patients with Type 2 diabetes [115]. However, in subjects with NASH, volixibat failed to reduce liver fat infiltration or hepatic injury [190]. In addition to their hypocholesterolemic effects [118,120,191], bile acid sequestrants have been shown to improve glycemic control through secretion of GLP-1, partially in a TGR5-dependent manner [121,191,192]. Colesevelam also protects against hepatic steatosis and fibrosis in mice [120]. In NASH subjects, colestimide promotes weight loss and reduces hepatic steatosis [193], but colesevelam was also reported to increase liver fat content [194]. Divergent data preclude any firm conclusion.

Blocking the hepatic recapture of bile acids is a strategy to increase the concentration of circulating bile acids and temporarily stimulate bile acid signaling in peripheral tissues. Notably, the activation of TGR5 and FXR in cells outside the enterohepatic cycle controls key metabolic processes such as food intake, energy expenditure and insulin sensitivity [16]. The postprandial elevation of serum bile acids induced by the pharmacological inhibition or genetic deletion of NTCP is accompanied by higher GLP-1 levels, reduction of diet-induced obesity and attenuation of liver fat infiltration in mice [130,195]. The protective effect of NTCP inhibition by Myrcludex B is partly due to a decreased intestinal fat absorption and greater fecal energy loss, and partly due to an increased brown adipose thermogenesis [130,195]. Currently, there is, to our knowledge, no data available on the promising effects of NTCP inhibition in NAFLD and metabolic diseases in humans.

## Conclusion and future perspectives

There is a plethora of strategies to tailor the bile acid pool, by tuning one or several key regulatory steps along the enterohepatic cycle or by adapting the environment. The strategies available as well as their application to NAFLD therapeutics were here screened and discussed. This review highlights the complex repercussions of modulating the size and composition of the bile acid pool, made of a mosaic of bile acid species and being the result of finely-tuned communications between the host tissues and the gut microorganisms. Although bile acid receptors FXR and TGR5 play pivotal roles in physiological homeostasis and in the treatment of pathophysiological conditions such as NAFLD, working upstream by reshaping the bile acid pool rather than directly targeting the receptors has been demonstrated effective and fruitful, consistent with the diverse and competitive binding of bile acids to receptors.

Before considering such strategy in the therapeutic armamentarium, some grey areas need clarification. First, appropriate and validated models to study both bile acids and NAFLD are required to enhance the understanding of bile acid-related mechanisms and to improve the translational relevance of the findings to humans. In this respect, there are new developments with generation of mice with CYP2C70 and CYP2A12 genes knockout, which have a ‘humanized’ bile acid pool. Once complemented by the ‘humanization’ of the gut microbiota and induction of NAFLD, they might provide data with high clinical relevance. Second, the intricate interactions between bile acids and the gut microorganisms are still to be dissected, though the task is demanding given the diversity of the gut microbial organisms and the multitude of bile acid species. We need to tackle this task to identify the microbial targets to skew bile acid metabolism and reshape a healthy bile acid pool in a tailored fashion and to test the effective consequences of microbiota-based interventions. Third, there is a strong rationale to modulate bile acid-receptors to treat NAFLD, though evidence of clinical efficacy is not convincing. Detangling the spatiotemporal complexity of the enterohepatic bile acid pool might help to better design new therapeutic strategies. There is still a long way to go, but the bile acid field clearly offers opportunities for breakthrough discoveries in personalized medicine for dysmetabolic disorders and NAFLD.

### Data Availability

Data sharing is not applicable to the paper.

## Competing Interests

The authors declare that there are no competing interests associated with the manuscript.

## Funding

J.G. is the recipient of a PhD fellowship from the F.R.S.-FNRS (Belgium) [grant number FC33785] and a research grant from the Belgian Association for the Study of the Liver (BASL). The work was supported by a grant from the F.R.S.-FNRS (Belgium) to I.A.L. [grant number T.0141.19].

## CRedit Author Contribution

**Justine Gillard:** Funding acquisition, Writing—original draft, Writing—review & editing. **Isabelle Leclercq:** Funding acquisition, Writing—original draft, Writing—review & editing.

## Abbreviations

ASBT, apical sodium-dependent bile salt transporter;  $\beta$ 3-HSD,  $\beta$ 3-hydroxysteroid dehydrogenase; bai, bile acid inducible; BSEP, bile salt export pump; BSH, bile salt hydrolase; C4,  $7\alpha$ -hydroxy-4-cholesten-3-one; CA, cholic acid; CDCA, chenodeoxycholic acid; CYP27A1, sterol 27-hydroxylase; CYP7A1, cholesterol  $7\alpha$ -hydroxylase; CYP7B1, oxysterol  $7\alpha$ -hydroxylase; CYP8B1, sterol  $12\alpha$ -hydroxylase; DCA, deoxycholic acid; FABP6, fatty acid binding protein 6; FGF, fibroblast growth factor; FMT, fecal material transplantation; FXR, Farnesoid X receptor; HC, healthy controls; HCA, hyocholic acid; HDCA, hyodeoxycholic acid; HFHC, high-fat high-cholesterol diet; HFHS, high-fat and high-sucrose diet; HFD, high-fat diet; LCA, lithocholic acid; MCA, muricholic acid; MCD, methionine-choline deficient diet; MDR, multidrug resistance protein; MRP, multidrug resistance associated-protein; NAFLD, non-alcoholic fatty liver disease; NASH, non-alcoholic steatohepatitis; NTCP, sodium taurocholate co-transporting polypeptide; OATP, organic anion transporting polypeptide; OST, organic solute transporter; SHP, small heterodimer protein; StarD1, steroidogenic acute regulatory protein 1; TGR5, Takeda G protein-coupled receptor 5; UDCA, ursodeoxycholic acid.

## References

- Chiang, J.Y.L. (2013) Bile acid metabolism and signaling. *Compr. Physiol.* **3**, 1191–1212, <https://doi.org/10.1002/cphy.c120023>
- Pandak, W.M. and Kakiyama, G. (2019) The acidic pathway of bile acid synthesis: Not just an alternative pathway. *Liver Res.* **3**, 88–98, <https://doi.org/10.1016/j.livres.2019.05.001>
- Duane, W.C. and Javitt, N.B. (1999) 27-Hydroxycholesterol: production rates in normal human subjects. *J. Lipid Res. N.d.* **40**, 1194–1199, [https://doi.org/10.1016/S0022-2275\(20\)33481-7](https://doi.org/10.1016/S0022-2275(20)33481-7)
- Jones, B.V., Begley, M., Hill, C., Gahan, C.G.M. and Marchesi, J.R. (2008) Functional and comparative metagenomic analysis of bile salt hydrolase activity in the human gut microbiome. *Proc. Natl. Acad. Sci. U.S.A.* **105**, 13580–13585, <https://doi.org/10.1073/pnas.0804437105>
- Guzior, D.V. and Quinn, R.A. (2021) Review: microbial transformations of human bile acids. *Microbiome* **9**, 1–13, <https://doi.org/10.1186/s40168-021-01101-1>
- Dawson, P.A. and Karpen, S.J. (2015) Intestinal transport and metabolism of bile acids. *J. Lipid Res.* **56**, 1085–1099, <https://doi.org/10.1194/jlr.R054114>
- Li, J. and Dawson, P.A. (2019) Animal models to study bile acid metabolism. *BBA - Mol. Basis Dis.* **1865**, 895–911, <https://doi.org/10.1016/j.bbadis.2018.05.011>
- de Boer, J.F., Verkade, E., Mulder, N.L., de Vries, H.D., Huijckman, N., Koehorst, M. et al. (2020) A human-like bile acid pool induced by deletion of hepatic Cyp2c70 modulates effects of FXR activation in mice. *J. Lipid Res.* **61**, 291–305, <https://doi.org/10.1194/jlr.RA119000243>
- Takahashi, S., Fukami, T., Masuo, Y., Brocker, C.N., Xie, C., Krausz, K.W. et al. (2016) Cyp2c70 is responsible for the species difference in bile acid metabolism between mice and humans. *J. Lipid Res.* **57**, 2130–2137, <https://doi.org/10.1194/jlr.M071183>
- Straniero, S., Laskar, A., Savva, C., Härdfeldt, J., Angelin, B. and Rudling, M. (2020) Of mice and men: Murine bile acids explain species differences in the regulation of bile acid and cholesterol metabolism. *J. Lipid Res.* **61**, 480–491, <https://doi.org/10.1194/jlr.RA119000307>
- Nguyen, T.L.A., Vieira-Silva, S., Liston, A. and Raes, J. (2015) How informative is the mouse for human gut microbiota research? *DMM Dis. Model Mech.* **8**, 1–16, <https://doi.org/10.1242/dmm.017400>
- Honda, A., Miyazaki, T., Iwamoto, J., Hirayama, T., Morishita, Y., Monma, T. et al. (2020) Regulation of bile acid metabolism in mouse models with hydrophobic bile acid composition. *J. Lipid Res.* **61**, 54–69, <https://doi.org/10.1194/jlr.RA119000395>
- Guo, G.L. and Chiang, J.Y.L. (2020) Is CYP2C70 the key to new mouse models to understand bile acids in humans? *J. Lipid Res.* **61**, 269–271, <https://doi.org/10.1194/jlr.C120000621>
- Ahmad, T.R. and Haeusler, R.A. (2019) Bile acids in glucose metabolism and insulin signalling — mechanisms and research needs. *Nat. Rev. Endocrinol.* **15**, 701–712, <https://doi.org/10.1038/s41574-019-0266-7>
- Bidault-Jourdainne, V., Merlen, G., Glénisson, M., Doignon, I., Garcin, I., Péan, N. et al. (2020) TGR5 controls bile acid composition and gallbladder function to protect the liver from bile acid overload. *JHEP Rep.* **3**, 100214
- Perino, A. and Schoonjans, K. (2022) Metabolic messengers: bile acids. *Nat. Metab.* **4**, 416–423, <https://doi.org/10.1038/s42255-022-00559-z>

- 17 Perino, A., Demagny, H., Velazquez-Villegas, L. and Schoonjans, K. (2021) Molecular physiology of bile acid signaling in health, disease, and aging. *Physiol. Rev.* **101**, 683–731, <https://doi.org/10.1152/physrev.00049.2019>
- 18 Chávez-Talavera, O., Tailleux, A., Lefebvre, P. and Staels, B. (2017) Bile acid control of metabolism and inflammation in obesity, Type 2 diabetes, dyslipidemia, and nonalcoholic fatty liver disease. *Gastroenterology* **152**, 1679–1694, <https://doi.org/10.1053/j.gastro.2017.01.055>
- 19 Fiorucci, S., Distrutti, E., Carino, A., Zampella, A. and Biagioli, M. (2021) Bile acids and their receptors in metabolic disorders. *Prog. Lipid Res.* **82**, 101094, <https://doi.org/10.1016/j.plipres.2021.101094>
- 20 Kremoser, C. (2021) FXR agonists for NASH: How are they different and what difference do they make? *J. Hepatol.* **75**, 12–15, <https://doi.org/10.1016/j.jhep.2021.03.020>
- 21 Caussy, C., Hsu, C., Singh, S., Bassirian, S., Kolar, J., Faulkner, C. et al. (2019) Serum bile acid patterns are associated with the presence of NAFLD in twins, and dose-dependent changes with increase in fibrosis stage in patients with biopsy-proven NAFLD. *Aliment. Pharmacol. Ther.* **49**, 183–193, <https://doi.org/10.1111/apt.15035>
- 22 Goodwin, B., Jones, S.A., Price, R.R., Watson, M.A., McKee, D.D., Moore, L.B. et al. (2000) A regulatory cascade of the nuclear receptors FXR, SHP-1, and LRH-1 represses bile acid biosynthesis. *Mol. Cell* **6**, 517–526, [https://doi.org/10.1016/S1097-2765\(00\)00051-4](https://doi.org/10.1016/S1097-2765(00)00051-4)
- 23 Kir, S., Zhang, Y., Gerard, R.D., Kiewer, S.A. and Mangelsdorf, D.J. (2012) Nuclear receptors HNF4 $\alpha$  and LRH-1 cooperate in regulating Cyp7a1 in vivo. *J. Biol. Chem.* **287**, 41334–41341, <https://doi.org/10.1074/jbc.M112.421834>
- 24 Lefebvre, P., Cariou, B., Lien, F., Kuipers, F. and Staels, B. (2009) Role of bile acids and bile acid receptors in metabolic regulation. *Physiol. Rev.* **89**, 147–191, <https://doi.org/10.1152/physrev.00010.2008>
- 25 Inagaki, T., Choi, M., Moschetta, A., Peng, L., Cummins, C.L., McDonald, J.G. et al. (2005) Fibroblast growth factor 15 functions as an enterohepatic signal to regulate bile acid homeostasis. *Cell Metab.* **2**, 217–225, <https://doi.org/10.1016/j.cmet.2005.09.001>
- 26 Holt, J.A., Luo, G., Billin, A.N., Bisi, J., McNeill, Y.Y., Kozarsky, K.F. et al. (2003) Definition of a novel growth factor-dependent signal cascade for the suppression of bile acid biosynthesis. *Genes Dev.* **17**, 1581–1591, <https://doi.org/10.1101/gad.1083503>
- 27 Lin, B.C., Wang, M., Blackmore, C. and Desnoyers, L.R. (2007) Liver-specific activities of FGF19 require Klotho beta \*  $\square$ . *J. Lipid Res.* **282**, 27277–27284, <https://doi.org/10.1074/jbc.M704244200>
- 28 Ferrell, J.M., Boehme, S., Li, F. and Chiang, J.Y.L. (2016) Cholesterol 7 $\alpha$ -hydroxylase-deficient mice are protected from high-fat/high-cholesterol diet-induced metabolic disorders. *J. Lipid Res.* **57**, 1144–1154, <https://doi.org/10.1194/jlr.M064709>
- 29 Rizzolo, D., Buckley, K., Kong, B., Zhan, L., Shen, J., Stofan, M. et al. (2019) Bile acid homeostasis in a cholesterol 7 $\alpha$ -hydroxylase and sterol 27-hydroxylase double knockout mouse model. *Hepatology* **70**, hep, 30612, <https://doi.org/10.1002/hep.30612>
- 30 Kong, B., Wang, L., Chiang, J.Y.L., Zhang, Y., Klaassen, C.D. and Guo, G.L. (2012) Mechanism of tissue-specific farnesoid X receptor in suppressing the expression of genes in bile-acid synthesis in mice. *Hepatology* **56**, 1034–1043, <https://doi.org/10.1002/hep.25740>
- 31 Pathak, P., Liu, H., Boehme, S., Xie, C., Krausz, K.W., Gonzalez, F. et al. (2017) Farnesoid X receptor induces Takeda G-protein receptor 5 cross-talk to regulate bile acid synthesis and hepatic metabolism. *J. Biol. Chem.* **292**, 11055–11069, <https://doi.org/10.1074/jbc.M117.784322>
- 32 Al-Khaifi, A., Rudling, M. and Angelin, B. (2018) An FXR agonist reduces bile acid synthesis independently of increases in FGF19 in healthy volunteers. *Gastroenterology* **155**, 1012–1016, <https://doi.org/10.1053/j.gastro.2018.06.038>
- 33 Mudaliar, S., Henry, R.R., Sanyal, A.J., Morrow, L., Marschall, H.U., Kipnes, M. et al. (2013) Efficacy and safety of the farnesoid x receptor agonist Obeticholic acid in patients with type 2 diabetes and nonalcoholic fatty liver disease. *Gastroenterology* **145**, 574.e1–582.e1, <https://doi.org/10.1053/j.gastro.2013.05.042>
- 34 Walters, J.R.F., Johnston, I.M., Nolan, J.D., Vassie, C., Pruzanski, M.E. and Shapiro, D.A. (2015) The response of patients with bile acid diarrhoea to the farnesoid x receptor agonist obeticholic acid. *Aliment. Pharmacol. Ther.* **41**, 54–64, <https://doi.org/10.1111/apt.12999>
- 35 Harrison, S.A., Bashir, M.R., Lee, K.-J., Shim-Lopez, J., Lee, J., Wagner, B. et al. (2021) A structurally optimized FXR agonist, MET409, reduced liver fat content over 12 weeks in patients with non-alcoholic steatohepatitis. *J. Hepatol.* **75**, 25–33, <https://doi.org/10.1016/j.jhep.2021.01.047>
- 36 Patel, K., Harrison, S.A., Elkashab, M., Trotter, J.F., Herring, R., Rojter, S. et al. (2020) Cilofexor, a nonsteroidal FXR agonist, in non-cirrhotic patients with nonalcoholic steatohepatitis: a phase 2 randomized controlled trial. *Hepatology* **72**, 58–71
- 37 Fang, S., Suh, J.M., Reilly, S.M., Yu, E., Osborn, O., Lackey, D. et al. (2015) Intestinal FXR agonism promotes adipose tissue browning and reduces obesity and insulin resistance. *Nat. Med.* **21**, 159–165, <https://doi.org/10.1038/nm.3760>
- 38 Pathak, P., Xie, C., Nichols, R.G., Ferrell, J.M., Boehme, S., Krausz, K.W. et al. (2018) Intestine farnesoid X receptor agonist and the gut microbiota activate G-protein bile acid receptor-1 signaling to improve metabolism. *Hepatology* **68**, 1574–1588, <https://doi.org/10.1002/hep.29857>
- 39 Hartmann, P., Hochrath, K., Horvath, A., Chen, P., Seebauer, C.T., Llorente, C. et al. (2018) Modulation of the intestinal bile acid/farnesoid X receptor/fibroblast growth factor 15 axis improves alcoholic liver disease in mice. *Hepatology* **67**, 2150–2166, <https://doi.org/10.1002/hep.29676>
- 40 Gillard, J., Picalausa, C., Ullmer, C., Adorini, L., Staels, B., Tailleux, A. et al. (2022) Enterohepatic Takeda G-protein coupled receptor 5 agonism in metabolic dysfunction-associated fatty liver disease and related glucose dysmetabolism. *Nutrients* **14**, 2707, <https://doi.org/10.3390/nu14132707>
- 41 Zhou, M., Learned, R.M., Rossi, S.J., Depaoli, A.M., Tian, H. and Ling, L. (2020) Engineered FGF19 eliminates bile acid toxicity and lipotoxicity leading to resolution of steatohepatitis and fibrosis in mice. *Hepatol. Commun.* **1**, 1024–1042, <https://doi.org/10.1002/hep4.1108>
- 42 Zhou, M., Wang, X., Phung, V., Lindhout, D.A., Mondal, K., Hsu, J. et al. (2014) Separating tumorigenicity from bile acid regulatory activity for endocrine hormone FGF19. *Cancer Res.* **74**, 3306–3316, <https://doi.org/10.1158/0008-5472.CAN-14-0208>
- 43 Rinella, M.E., Trotter, J.F., Abdelmalek, F., Rossi, S.J., Depaoli, M., Harrison, S.A. et al. (2019) Rosuvastatin improves the FGF19 analogue NGM282-associated lipid changes in patients with non-alcoholic steatohepatitis lipid changes in patients with non-alcoholic steatohepatitis. *J. Hepatol.* **70**, 735–744, <https://doi.org/10.1016/j.jhep.2018.11.032>
- 44 Sanyal, A.J., Ling, L., Beuers, U., DePaoli, A.M., Lieu, H.D., Harrison, S.A. et al. (2021) Potent suppression of hydrophobic bile acids by aldafermin, an FGF19 analogue, across metabolic and cholestatic liver diseases. *JHEP Rep.* **3**, 100255, <https://doi.org/10.1016/j.jhepr.2021.100255>

- 45 Harrison, S.A., Neff, G., Guy, C.D., Bashir, M.R., Paredes, A.H., Frias, J.P. et al. (2021) Efficacy and safety of aldafermin, an engineered FGF19 analog, in a randomized, double-blind, placebo-controlled trial of patients with nonalcoholic steatohepatitis. *Gastroenterology* **160**, 219.e1–231.e1, <https://doi.org/10.1053/j.gastro.2020.08.004>
- 46 Conde de la Rosa, L., Garcia-Ruiz, C., Vallejo, C., Baulies, A., Nuñez, S., Monte, M.J. et al. (2021) STARD1 promotes NASH-driven HCC by sustaining the generation of bile acids through the alternative mitochondrial pathway. *J. Hepatol.* **74**, 1429–1441, <https://doi.org/10.1016/j.jhep.2021.01.028>
- 47 Miyake, J.H., Wang, S.L. and Davis, R.A. (2000) Bile acid induction of cytokine expression by macrophages correlates with repression of hepatic cholesterol 7 $\alpha$ -hydroxylase. *J. Biol. Chem.* **275**, 21805–21808, <https://doi.org/10.1074/jbc.C000275200>
- 48 Wang, R., Chen, H.L., Liu, L., Sheps, J.A., Phillips, M.J. and Ling, V. (2009) Compensatory role of P-glycoproteins in knockout mice lacking the bile salt export pump. *Hepatology* **50**, 948–956, <https://doi.org/10.1002/hep.23089>
- 49 Lam, P., Wang, R. and Ling, V. (2005) Bile acid transport in sister of P-glycoprotein (ABCB1) knockout mice. *Biochemistry* **44**, 12598–12605, <https://doi.org/10.1021/bi050943e>
- 50 Fiorucci, S., Rizzo, G., Donini, A., Distrutti, E. and Santucci, L. (2007) Targeting farnesoid X receptor for liver and metabolic disorders. *Trends Mol. Med.* **13**, 298–309, <https://doi.org/10.1016/j.molmed.2007.06.001>
- 51 Ridlon, J.M., Kang, D.J. and Hylemon, P.B. (2006) Bile salt biotransformations by human intestinal bacteria. *J. Lipid Res.* **47**, 241–259, <https://doi.org/10.1194/jlr.R500013-JLR200>
- 52 Selwyn, F.P., Csanaky, I.L., Zhang, Y. and Klaassen, C.D. (2015) Importance of large intestine in regulating bile acids and glucagon-like peptide-1 in germ-free mice. *Drug Metab. Dispos.* **43**, 1544–1556, <https://doi.org/10.1124/dmd.115.065276>
- 53 Sayin, S.I., Wahlström, A., Felin, J., Jäntti, S., Marschall, H.U., Bamberg, K. et al. (2013) Gut microbiota regulates bile acid metabolism by reducing the levels of tauro-beta-muricholic acid, a naturally occurring FXR antagonist. *Cell Metab.* **17**, 225–235, <https://doi.org/10.1016/j.cmet.2013.01.003>
- 54 Swann, J.R., Want, E.J., Geier, F.M., Spagou, K., Wilson, I.D., Sidaway, J.E. et al. (2011) Systemic gut microbial modulation of bile acid metabolism in host tissue compartments. *Proc. Natl. Acad. Sci. U.S.A.* **108**, 4523–4530, <https://doi.org/10.1073/pnas.1006734107>
- 55 Song, Z., Cai, Y., Lao, X., Wang, X., Lin, X., Cui, Y. et al. (2019) Taxonomic profiling and populational patterns of bacterial bile salt hydrolase (BSH) genes based on worldwide human gut microbiome. *Microbiome* **7**, 9, <https://doi.org/10.1186/s40168-019-0628-3>
- 56 Foley, M.H., O’Flaherty, S., Allen, G., Rivera, A.J., Stewart, A.K., Barrangou, R. et al. (2021) Lactobacillus bile salt hydrolase substrate specificity governs bacterial fitness and host colonization. *Proc. Natl. Acad. Sci.* **118**, e2017709118, <https://doi.org/10.1073/pnas.2017709118>
- 57 Funabashi, M., Grove, T.L., Wang, M., Varma, Y., McFadden, M.E., Brown, L.C. et al. (2020) A metabolic pathway for bile acid dehydroxylation by the gut microbiome. *Nature* **582**, 566–570, <https://doi.org/10.1038/s41586-020-2396-4>
- 58 Streidl, T., Karkossa, I., Segura Muñoz, R.R., Eberl, C., Zaufel, A., Plagge, J. et al. (2021) The gut bacterium *Extibacter muris* produces secondary bile acids and influences liver physiology in gnotobiotic mice. *Gut Microbes* **13**, 1–21, <https://doi.org/10.1080/19490976.2020.1854008>
- 59 Ridlon, J.M., Harris, S.C., Bhowmik, S., Kang, D.-J. and Hylemon, P.B. (2016) Consequences of bile salt biotransformations by intestinal bacteria. *Gut Microbes* **7**, 22–39, <https://doi.org/10.1080/19490976.2015.1127483>
- 60 Lucas, L.N., Barrett, K., Kerby, R.L., Zhang, Q., Cattaneo, L.E., Stevenson, D. et al. (2021) Dominant bacterial phyla from the human gut show widespread ability to transform and conjugate bile acids. *MSystems* **6**, <https://doi.org/10.1128/mSystems.00805-21>
- 61 Devlin, A.S., Fischbach, M.A., Biosciences, Q., Francisco, S., Francisco, S. and Sciences T (2015) A biosynthetic pathway for a prominent class of microbiota-derived bile acids. *Nat. Chem. Biol.* **11**, 685–690, <https://doi.org/10.1038/nchembio.1864>
- 62 Paik, D., Yao, L., Zhang, Y., Bae, S., D’Agostino, G.D., Zhang, M. et al. (2022) *Human gut bacteria produce  $\tau$ 17-modulating bile acid metabolites*, vol. 603, Springer, US
- 63 Sato, Y., Atarashi, K., Plichta, D.R., Arai, Y., Sasajima, S., Kearney, S.M. et al. (2021) Novel bile acid biosynthetic pathways are enriched in the microbiome of centenarians. *Nature* **599**, 458–464, <https://doi.org/10.1038/s41586-021-03832-5>
- 64 Campbell, C., Mckenney, P.T., Konstantinovskiy, D., Isaeva, O.I., Schizas, M., Verter, J. et al. (2020) Bacterial metabolism of bile acids promotes generation of peripheral regulatory T cells. *Nature* **581**, 475–479, <https://doi.org/10.1038/s41586-020-2193-0>
- 65 Li, W., Hang, S., Fang, Y., Yao, L., Devlin, A.S. and Huh, J.R. (2021) Article A bacterial bile acid metabolite modulates T reg activity through the nuclear hormone receptor NR4A1 A bacterial bile acid metabolite modulates T reg activity through the nuclear hormone receptor NR4A1. *Cell Host Microbe* **29**, 1366.e9–1377.e9, <https://doi.org/10.1016/j.chom.2021.07.013>
- 66 Hang, S., Paik, D., Yao, L., Kim, E., Jamma, T., Lu, J. et al. (2019) Bile acid metabolites control TH17 and Treg cell differentiation. *Nature* **576**, 1–6, <https://doi.org/10.1038/s41586-019-1785-z>
- 67 Quinn, R.A., Melnik, A.V., Vrbanac, A., Fu, T., Patras, K.A., Christy, M.P. et al. (2020) Global chemical effects of the microbiome include new bile-acid conjugations. *Nature* **579**, 123–129, <https://doi.org/10.1038/s41586-020-2047-9>
- 68 Sivamaruthi, B.S., Fern, L.A., Rashidah Pg Hj Ismail, D.S.N. and Chaiyasut, C. (2020) The influence of probiotics on bile acids in diseases and aging. *Biomed. Pharmacother.* **128**, 110310, <https://doi.org/10.1016/j.biopha.2020.110310>
- 69 Begley, M., Hill, C. and Gahan, C.G.M. (2006) Bile salt hydrolase activity in probiotics. *Appl. Environ. Microbiol.* **72**, 1729–1738, <https://doi.org/10.1128/AEM.72.3.1729-1738.2006>
- 70 Joyce, S.A., MacSharry, J., Casey, P.G., Kinsella, M., Murphy, E.F., Shanahan, F. et al. (2014) Regulation of host weight gain and lipid metabolism by bacterial bile acid modification in the gut. *Proc. Natl. Acad. Sci. U.S.A.* **111**, 7421–7426, <https://doi.org/10.1073/pnas.1323599111>
- 71 Russell, B.J., Brown, S.D., Siguenza, N., Mai, I., Saran, A.R., Lingaraju, A. et al. (2022) Intestinal transgene delivery with native *E. coli* chassis allows persistent physiological changes. *Cell* **185**, 1–15, <https://doi.org/10.1016/j.cell.2022.06.050>
- 72 Cheng, F.S., Pan, D., Chang, B., Jiang, M. and Sang, L.X. (2020) Probiotic mixture VSL#3: An overview of basic and clinical studies in chronic diseases. *World J. Clin. Cases* **8**, 1361–1384, <https://doi.org/10.12998/wjcc.v8.i8.1361>
- 73 Degirolamo, C., Rainaldi, S., Bovenga, F., Murzilli, S. and Moschetta, A. (2014) Microbiota modification with probiotics induces hepatic bile acid synthesis via downregulation of the Fxr-Fgf15 axis in mice. *Cell Rep.* **7**, 12–18, <https://doi.org/10.1016/j.celrep.2014.02.032>



- 74 Martoni, C.J., Labbé, A., Ganopoulos, J.G., Prakash, S. and Jones, M.L. (2015) Changes in bile acids, FGF-19 and sterol absorption in response to bile salt hydrolase active *L. reuteri* NCIMB 30242. *Gut Microbes* **6**, 57–65, <https://doi.org/10.1080/19490976.2015.1005474>
- 75 Jones, M.L., Martoni, C.J., Parent, M. and Prakash, S. (2012) Cholesterol-lowering efficacy of a microencapsulated bile salt hydrolase-active *Lactobacillus reuteri* NCIMB 30242 yoghurt formulation in hypercholesterolaemic adults. *Br. J. Nutr.* **107**, 1505–1513, <https://doi.org/10.1017/S0007114511004703>
- 76 Jones, M.L., Martoni, C.J. and Prakash, S. (2012) Cholesterol lowering and inhibition of sterol absorption by *Lactobacillus reuteri* NCIMB 30242: A randomized controlled trial. *Eur. J. Clin. Nutr.* **66**, 1234–1241, <https://doi.org/10.1038/ejcn.2012.126>
- 77 Culpepper, T., Rowe, C.C., Rusch, C.T., Burns, A.M., Federico, A.P., Girard, S.-A. et al. (2019) Three probiotic strains exert different effects on plasma bile acid profiles in healthy obese adults: randomised, double-blind placebo-controlled crossover study. *Benef. Microbes* **10**, 497–509, <https://doi.org/10.3920/BM2018.0151>
- 78 Doerner, K.C., Takamine, F., Lavoie, C.P., Mallonee, D.H. and Hylemon, P.B. (1997) Assessment of fecal bacteria with bile acid 7-dehydroxylating activity for the presence of bai-like genes. *Appl. Environ. Microbiol.* **63**, 1185–8, <https://doi.org/10.1128/aem.63.3.1185-1188.1997>
- 79 Buffie, C.G., Bucci, V., Stein, R.R., McKenney, P.T., Ling, L., Gobourne, A. et al. (2015) Precision microbiome reconstitution restores bile acid mediated resistance to *Clostridium difficile*. *Nature* **517**, 205–208, <https://doi.org/10.1038/nature13828>
- 80 Ma, C., Han, M., Heinrich, B., Fu, Q., Zhang, Q., Sandhu, M. et al. (2018) Gut microbiome-mediated bile acid metabolism regulates liver cancer via NKT cells. *Science* **360**, eaan5931, <https://doi.org/10.1126/science.aan5931>
- 81 Burgess, S.L., Leslie, J.L., Uddin, J., Oakland, D.N., Gilchrist, C., Moreau, G.B. et al. (2020) Gut microbiome communication with bone marrow regulates susceptibility to amebiasis. *J. Clin. Invest.* **140**, 4019–4024, <https://doi.org/10.1172/JCI133605>
- 82 Marion, S., Studer, N., Desharnais, L., Menin, L., Escrig, S., Meibom, A. et al. (2019) In vitro and in vivo characterization of *Clostridium scindens* bile acid transformations. *Gut Microbes* **10**, 481–503, <https://doi.org/10.1080/19490976.2018.1549420>
- 83 van der Lelie, D., Oka, A., Taghavi, S., Umeno, J., Fan, T.J., Merrell, K.E. et al. (2021) Rationally designed bacterial consortia to treat chronic immune-mediated colitis and restore intestinal homeostasis. *Nat. Commun.* **12**, 1–17, <https://doi.org/10.1038/s41467-021-23460-x>
- 84 Li, X., Chu, Q., Huang, Y., Xiao, Y., Song, L., Zhu, S. et al. (2019) Consortium of probiotics attenuates colonization of *Clostridioides difficile*. *Front. Microbiol.* **10**, 1–12, <https://doi.org/10.3389/fmicb.2019.02871>
- 85 Brown, J.R.-M., Flemer, B., Joyce, S.A., Zulquernain, A., Sheehan, D., Shanahan, F. et al. (2018) Changes in microbiota composition, bile and fatty acid metabolism, in successful faecal microbiota transplantation for *Clostridioides difficile* infection. *BMC Gastroenterol.* **18**, 131, <https://doi.org/10.1186/s12876-018-0860-5>
- 86 Seekatz, A.M., Theriot, C.M., Rao, K., Chang, Y.M., Freeman, A.E., Kao, J.Y. et al. (2018) Restoration of short chain fatty acid and bile acid metabolism following fecal microbiota transplantation in patients with recurrent *Clostridium difficile* infection. *Anaerobe* **53**, 64–73, <https://doi.org/10.1016/j.anaerobe.2018.04.001>
- 87 Mullish, B.H., McDonald, J.A.K., Pechlivanis, A., Allegretti, J.R., Kao, D., Barker, G.F. et al. (2019) Microbial bile salt hydrolases mediate the efficacy of faecal microbiota transplant in the treatment of recurrent *Clostridioides difficile* infection. *Gut* **68**, 1791–1800, <https://doi.org/10.1136/gutjnl-2018-317842>
- 88 Weingarden, A.R., Chen, C., Bobr, A., Yao, D., Lu, Y., Nelson, V.M. et al. (2014) Microbiota transplantation restores normal fecal bile acid composition in recurrent *Clostridium difficile* infection. *Am. J. Physiol. Liver Physiol.* **306**, G310–G319
- 89 Staley, C., Vaughn, B.P., Graiziger, C.T., Singroy, S., Hamilton, M.J., Yao, D. et al. (2017) Community dynamics drive punctuated engraftment of the fecal microbiome following transplantation using freeze-dried, encapsulated fecal microbiota. *Gut Microbes* **8**, 276–288, <https://doi.org/10.1080/19490976.2017.1299310>
- 90 Kuribayashi, H., Miyata, M., Yamakawa, H., Yoshinari, K. and Yamazoe, Y. (2012) Enterobacteria-mediated deconjugation of taurocholic acid enhances ileal farnesoid X receptor signaling. *Eur. J. Pharmacol.* **697**, 132–138, <https://doi.org/10.1016/j.ejphar.2012.09.048>
- 91 Zarrinpar, A., Chaix, A., Xu, Z.Z., Chang, M.W., Marotz, C.A., Saghatelian, A. et al. (2018) Antibiotic-induced microbiome depletion alters metabolic homeostasis by affecting gut signaling and colonic metabolism. *Nat. Commun.* **9**, 2872, <https://doi.org/10.1038/s41467-018-05336-9>
- 92 Berr, F., Kullak-Ublick, G.A., Paumgartner, G., Monzing, W. and Hylemon, P.B. (1996) 7 $\alpha$ -Dehydroxylating bacteria enhance deoxycholic acid input and cholesterol saturation of bile in patients with gallstones. *Gastroenterology* **111**, 1611–1620, [https://doi.org/10.1016/S0016-5085\(96\)70024-0](https://doi.org/10.1016/S0016-5085(96)70024-0)
- 93 Kelly, C.P., Nguyen, C.C., Palmieri, L.J., Pallav, K., Dowd, S.E., Humbert, L. et al. (2019) *Saccharomyces boulardii* CNCM I-745 modulates the fecal bile acids metabolism during antimicrobial therapy in healthy volunteers. *Front. Microbiol.* **10**, 1–6, <https://doi.org/10.3389/fmicb.2019.00336>
- 94 Campbell, D.E., Ly, L.K., Ridlon, J.M., Hsiao, A., Whitaker, R.J., Degnan, P.H. et al. (2020) Article infection with bacteroides phage BV01 Alters the host transcriptome and bile acid metabolism in a common human gut microbe II Infection with bacteroides phage BV01 alters the host transcriptome and bile acid metabolism in a common human gut mic. *Cell Rep.* **32**, 108142, <https://doi.org/10.1016/j.celrep.2020.108142>
- 95 Adhikari, A.A., Ramachandran, D., Chaudhari, S.N., Powell, C.E., Li, W., McCurry, M.D. et al. (2021) A gut-restricted lithocholic acid analog as an inhibitor of gut bacterial bile salt hydrolases. *ACS Chem. Biol.* **16**, 1401–1412, <https://doi.org/10.1021/acscchembio.1c00192>
- 96 Adhikari, A.A., Seegar, T.C.M., Ficarro, S.B., McCurry, M.D., Ramachandran, D., Yao, L. et al. (2020) Development of a covalent inhibitor of gut bacterial bile salt hydrolases. *Nat. Chem. Biol.* **16**, 318–326, <https://doi.org/10.1038/s41589-020-0467-3>
- 97 Pushpass, R.A.G., Alzoufari, S., Jackson, K.G. and Lovegrove, J.A. (2021) Circulating bile acids as a link between the gut microbiota and cardiovascular health: Impact of Prebiotics, probiotics and polyphenol-rich foods. *Nutr. Res. Rev.* **35**, 1–54
- 98 Cheng, H., Liu, J., Zhang, D., Tan, Y., Feng, W. and Peng, C. (2022) Gut microbiota, bile acids, and nature compounds. *Phyther. Res.* **36**, 3102–3119, <https://doi.org/10.1002/ptr.7517>
- 99 Nicolucci, A.C., Hume, M.P., Martínez, I., Mayengbam, S., Walter, J. and Reimer, R.A. (2017) Prebiotics reduce body fat and alter intestinal microbiota in children who are overweight or with obesity. *Gastroenterology* **153**, 711–722, <https://doi.org/10.1053/j.gastro.2017.05.055>

- 100 Makki, K., Brolin, H., Petersen, N., Henricsson, M., Christensen, D.P., Khan, M.T. et al. (2022) 6 $\alpha$ -hydroxylated bile acids mediate TGR5 signalling to improve glucose metabolism upon dietary fiber supplementation in mice. *Gut* **1**–11, <https://doi.org/10.1136/gutjnl-2021-326541>
- 101 Adebola, O.O., Corcoran, O. and Morgan, W.A. (2020) PharmaNutrition prebiotics may alter bile salt hydrolase activity: possible implications for cholesterol metabolism. *Pharma. Nutrition* **12**, 100182, <https://doi.org/10.1016/j.phanu.2020.100182>
- 102 Wolf, P.G., Devendran, S., Doden, H.L., Ly, L.K., Moore, T., Takei, H. et al. (2021) Berberine alters gut microbial function through modulation of bile acids. *BMC Microbiol.* **21**, 1–15, <https://doi.org/10.1186/s12866-020-02020-1>
- 103 Sun, R., Yang, N., Kong, B., Cao, B., Feng, D., Yu, X. et al. (2017) Orally administered berberine modulates hepatic lipid metabolism by altering microbial bile acid metabolism and the intestinal FXR signaling pathway. *Mol. Pharmacol.* **91**, 110–122, <https://doi.org/10.1124/mol.116.106617>
- 104 Guo, Y., Zhang, Y., Huang, W., Selwyn, F.P. and Klaassen, C.D. (2016) Dose-response effect of berberine on bile acid profile and gut microbiota in mice. *BMC Complement. Altern. Med.* **16**, 1–12, <https://doi.org/10.1186/s12906-016-1367-7>
- 105 Wang, Y., Tai, Y., Zhao, D., Zhang, Y., Yan, J., Kakiyama, G. et al. (2021) Berberine prevents disease progression of nonalcoholic steatohepatitis through modulating multiple pathways. *Cells* **10**, 210, <https://doi.org/10.3390/cells10020210>
- 106 Tian, Y., Cai, J., Gui, W., Nichols, R.G., Koo, I., Zhang, J. et al. (2019) Berberine directly affects the gut microbiota to promote intestinal farnesoid X receptor activation. *Drug Metab. Dispos.* **47**, 86–93, <https://doi.org/10.1124/dmd.118.083691>
- 107 Watanabe, K., Igarashi, M., Li, X., Nakatani, A., Miyamoto, J., Inaba, Y. et al. (2018) Dietary soybean protein ameliorates high-fat diet-induced obesity by modifying the gut microbiota-dependent biotransformation of bile acids. *PLoS ONE* **13**, e0202083, <https://doi.org/10.1371/journal.pone.0202083>
- 108 Guo, J., Han, X., Tan, H., Huang, W., You, Y. and Zhan, J. (2019) Blueberry extract improves obesity through regulation of the gut microbiota and bile acids via pathways involving FXR and TGR5. *iScience* **19**, 676–690, <https://doi.org/10.1016/j.isci.2019.08.020>
- 109 Huang, F., Zheng, X., Ma, X., Jiang, R., Zhou, W., Zhou, S. et al. (2019) Theabrownin from Pu-erh tea attenuates hypercholesterolemia via modulation of gut microbiota and bile acid metabolism. *Nat. Commun.* **10**, 1–17, <https://doi.org/10.1038/s41467-019-12896-x>
- 110 Chen, L., Yao, X., Young, A., McNulty, J., Anderson, D., Liu, Y. et al. (2012) Inhibition of apical sodium-dependent bile acid transporter as a novel treatment for diabetes. *Am. J. Physiol. - Endocrinol. Metab.* **302**, 68–76, <https://doi.org/10.1152/ajpendo.00323.2011>
- 111 Lundåsen, T., Andersson, E.M., Snaith, M., Lindmark, H., Lundberg, J., Östlund-Lindqvist, A.M. et al. (2012) Inhibition of intestinal bile acid transporter Slc10a2 improves triglyceride metabolism and normalizes elevated plasma glucose levels in mice. *PLoS ONE* **7**, 1–14, <https://doi.org/10.1371/journal.pone.0037787>
- 112 Rao, A., Kusters, A., Mells, J.E., Zhang, W., Setchell, K.D.R., Amanso, A.M. et al. (2016) Inhibition of ileal bile acid uptake protects against nonalcoholic fatty liver disease in high-fat diet-fed mice. *Sci. Transl. Med.* **8**, 357ra122–357ra122, <https://doi.org/10.1126/scitranslmed.aaf4823>
- 113 Tiessen, R.G., Kennedy, C.A., Keller, B.T., Levin, N., Acevedo, L., Gedulin, B. et al. (2018) Safety, tolerability and pharmacodynamics of apical sodium-dependent bile acid transporter inhibition with volixibat in healthy adults and patients with type 2 diabetes mellitus: a randomised placebo-controlled trial. *BMC Gastroenterol.* **18**, 3, <https://doi.org/10.1186/s12876-017-0736-0>
- 114 Palmer, M., Jennings, L., Silberg, D.G., Bliss, C. and Martin, P. (2018) A randomised, double-blind, placebo-controlled phase 1 study of the safety, tolerability and pharmacodynamics of volixibat in overweight and obese but otherwise healthy adults: Implications for treatment of non-alcoholic steatohepatitis. *BMC Pharmacol. Toxicol.* **19**, 1–13, <https://doi.org/10.1186/s40360-018-0200-y>
- 115 Nunez, D.J., Yao, X., Lin, J., Walker, A., Zuo, P., Webster, L. et al. (2016) Glucose and lipid effects of the ileal apical sodium-dependent bile acid transporter inhibitor GSK2330672: double-blind randomized trials with type 2 diabetes subjects taking metformin. *Diabetes Obes. Metab.* **18**, 654–662, <https://doi.org/10.1111/dom.12656>
- 116 Graffner, H., Gillberg, P.G., Rikner, L. and Marschall, H.U. (2016) The ileal bile acid transporter inhibitor A4250 decreases serum bile acids by interrupting the enterohepatic circulation. *Aliment. Pharmacol. Ther.* **43**, 303–310, <https://doi.org/10.1111/apt.13457>
- 117 van de Wiel, S.M.W., de Waart, D.R., Oude Elferink, R.P.J. and van de Graaf, S.F.J. (2018) Intestinal farnesoid X receptor activation by pharmacologic inhibition of the organic solute transporter  $\alpha$ - $\beta$ . *Cmgh* **5**, 223–237, <https://doi.org/10.1016/j.jcmgh.2017.11.011>
- 118 Staels, B., Handelsman, Y. and Fonseca, V. (2010) Bile acid sequestrants for lipid and glucose control. *Curr. Diab. Rep.* **10**, 70–77, <https://doi.org/10.1007/s11892-009-0087-5>
- 119 Zhang, Y. and Klaassen, C.D. (2010) Effects of feeding bile acids and a bile acid sequestrant on hepatic bile acid composition in mice. *J. Lipid Res.* **51**, 3230–3242, <https://doi.org/10.1194/jlr.M007641>
- 120 Hartmann, P., Duan, Y., Miyamoto, Y., Demir, M., Lang, S., Hasa, E. et al. (2022) Colesevelam ameliorates non-alcoholic steatohepatitis and obesity in mice. *Hepatol. Int.* **16**, 359–370, <https://doi.org/10.1007/s12072-022-10296-w>
- 121 Watanabe, M., Morimoto, K., Houten, S.M., Kaneko-Iwasaki, N., Sugizaki, T., Horai, Y. et al. (2012) Bile acid binding resin improves metabolic control through the induction of energy expenditure. *PLoS ONE* **7**, e38286, <https://doi.org/10.1371/journal.pone.0038286>
- 122 Kunst, R.F., Verkade, H.J., Oude Elferink, R.P.J. and van de Graaf, S.F.J. (2020) Targeting the four pillars of enterohepatic bile salt cycling; lessons from genetics and pharmacology. *Hepatology* **73**, 0–3
- 123 Blank, A., Markert, C., Hohmann, N., Carls, A., Mikus, G., Lehr, T. et al. (2016) First-in-human application of the novel hepatitis B and hepatitis D virus entry inhibitor myrcludex B. *J. Hepatol.* **65**, 483–489, <https://doi.org/10.1016/j.jhep.2016.04.013>
- 124 Blank, A., Eidam, A., Haag, M., Hohmann, N., Burhenne, J., Schwab, M. et al. (2018) The NTCP-inhibitor Myrcludex B: effects on bile acid disposition and tenofovir pharmacokinetics. *Clin. Pharmacol. Ther.* **103**, 341–348, <https://doi.org/10.1002/cpt.744>
- 125 Bogomolov, P., Alexandrov, A., Voronkova, N., Macievich, M., Kokina, K., Petrachenkova, M. et al. (2016) Treatment of chronic hepatitis D with the entry inhibitor myrcludex B: First results of a phase Ib/IIa study. *J. Hepatol.* **65**, 490–498, <https://doi.org/10.1016/j.jhep.2016.04.016>
- 126 Slijepcevic, D., Kaufman, C., Wichers, C.G.K., Gilgion, E.H., Lempp, F.A., Duijst, S. et al. (2015) Impaired uptake of conjugated bile acids and hepatitis b virus pres1-binding in na + -taurocholate cotransporting polypeptide knockout mice. *Hepatology* **62**, 207–219, <https://doi.org/10.1002/hep.27694>
- 127 Mao, F., Liu, T., Hou, X., Zhao, H., He, W., Li, C. et al. (2019) Increased sulfation of bile acids in mice and human subjects with sodium taurocholate cotransporting polypeptide deficiency. *J. Biol. Chem.* **294**, 11853–11862, <https://doi.org/10.1074/jbc.RA118.007179>

- 128 Slijepcevic, D., Abbing, R.L.P.R., Katafuchi, T., Blank, A., Donkers, J.M., van Hoppe, S. et al. (2017) Hepatic uptake of conjugated bile acids is mediated by both sodium taurocholate cotransporting polypeptide and organic anion transporting polypeptides and modulated by intestinal sensing of plasma bile acid levels in mice LIVER BIOLOGY/PATHOBIOLOGY A HE S. *Hepatology* **66**, 1631–1643, <https://doi.org/10.1002/hep.29251>
- 129 Donkers, J.M., Appelman, M.D. and van de Graaf, S.F.J. (2019) *Mechanistical insights to the inhibition of NTCP by Myrcludex B*, Elsevier B.V. on behalf of European Association for the Study of the Liver (EASL)
- 130 Donkers, J.M., Roscam Abbing, R.L.P., van Weeghel, M., Levels, J.H.M., Boelen, A., Schinkel, A.H. et al. (2020) Inhibition of hepatic bile acid uptake by myrcludex B promotes glucagon-like peptide-1 release and reduces obesity. *Cell Mol. Gastroenterol. Hepatol.* **10**, 451–466, <https://doi.org/10.1016/j.jcmgh.2020.04.009>
- 131 Gillard, J., Clerbaux, L.A., Nachit, M., Sempoux, C., Staels, B., Bindels, L.B. et al. (2022) Bile acids contribute to the development of non-alcoholic steatohepatitis in mice. *JHEP Rep.* **4**, 100387, <https://doi.org/10.1016/j.jhepr.2021.100387>
- 132 McMahan, R.H., Wang, X.X., Cheng, L.L., Krisko, T., Smith, M. and Kasmi, K. (2013) Et, et al. Bile acid receptor activation modulates hepatic monocyte activity and improves nonalcoholic fatty liver disease. *J. Biol. Chem.* **288**, 11761–11770, <https://doi.org/10.1074/jbc.M112.446575>
- 133 Roth, J.D., Feigh, M., Veidal, S.S., Fensholdt, L.K.D., Rigbolt, K.T., Hansen, H.H. et al. (2018) INT-767 improves histopathological features in a diet-induced ob/ob mouse model of biopsy-confirmed nonalcoholic steatohepatitis. *World J. Gastroenterol.* **24**, 195–210, <https://doi.org/10.3748/wjg.v24.i2.195>
- 134 Iracheta-Vellve, A., Calenda, C.D., Petrasek, J., Ambade, A., Kody, K., Adorini, L. et al. (2018) FXR and TGR5 agonists ameliorate liver injury, steatosis, and inflammation after binge or prolonged alcohol feeding in mice. *Hepatal. Commun.* **2**, 1379–1391, <https://doi.org/10.1002/hep4.1256>
- 135 Carino, A., Cipriani, S., Marchiani, S., Biagioli, M., Santorelli, C., Donini, A. et al. (2017) BAR502, a dual FXR and GPBAR1 agonist, promotes browning of white adipose tissue and reverses liver steatosis and fibrosis. *Sci. Rep.* **7**, 1–13, <https://doi.org/10.1038/srep42801>
- 136 Voronova, V., Sokolov, V., Al-Khafi, A., Straniero, S., Kumar, C., Peskov, K. et al. (2020) A physiology-based model of bile acid distribution and metabolism under healthy and pathologic conditions in human beings. *Cmgh* **10**, 149–170, <https://doi.org/10.1016/j.jcmgh.2020.02.005>
- 137 Wang, D., Doestzada, M., Chen, L., Andreu-Sánchez, S., van den Munckhof, I.C.L., Augustijn, H.E. et al. (2021) Characterization of gut microbial structural variations as determinants of human bile acid metabolism. *Cell Host Microbe* **29**, 1802.e5–1814.e5, <https://doi.org/10.1016/j.chom.2021.11.003>
- 138 Anhê, F.F., Nachbar, R.T., Varin, T.V., Trottier, J., Dudonné, S., Le Barz, M. et al. (2018) Treatment with camu camu (*Myrciaria dubia*) prevents obesity by altering the gut microbiota and increasing energy expenditure in diet-induced obese mice. *Gut* **68**, 435–464
- 139 Li, M., Wang, S., Li, Y., Zhao, M., Kuang, J., Liang, D. et al. (2022) Gut microbiota-bile acid crosstalk contributes to the rebound weight gain after calorie restriction in mice. *Nat. Commun.* **13**, 2060, <https://doi.org/10.1038/s41467-022-29589-7>
- 140 Cai, H., Wen, Z., Meng, K. and Yang, P. (2021) Metabolomic signatures for liver tissue and cecum contents in high-fat diet-induced obese mice based on UHPLC-Q-TOF/MS. *Nutr. Metab.* **18**, 1–14, <https://doi.org/10.1186/s12986-021-00595-8>
- 141 Fu, T., Coulter, S., Yoshihara, E., Oh, T.G., Fang, S., Cayabyab, F. et al. (2019) FXR regulates intestinal cancer stem cell proliferation. *Cell* **176**, 1098.e18–1112.e18, <https://doi.org/10.1016/j.cell.2019.01.036>
- 142 Carino, A., Marchiani, S., Biagioli, M., Bucci, M., Vellecco, V., Brancalone, V. et al. (2019) Agonism for the bile acid receptor GPBAR1 reverses liver and vascular damage in a mouse model of steatohepatitis. *FASEB J.* **33**, 2809–2822, <https://doi.org/10.1096/fj.201801373RR>
- 143 Nakade, Y., Kitano, R., Sakamoto, K., Kimoto, S., Yamauchi, T., Inoue, T. et al. (2021) Characteristics of bile acid composition in high fat diet-induced nonalcoholic fatty liver disease in obese diabetic rats. *PLoS ONE* **16**, 1–15, <https://doi.org/10.1371/journal.pone.0247303>
- 144 David, L.A., Maurice, C.F., Carmody, R.N., Gootenberg, D.B., Button, J.E., Wolfe, B.E. et al. (2014) Diet rapidly and reproducibly alters the human gut microbiome. *Nature* **505**, 559–563, <https://doi.org/10.1038/nature12820>
- 145 Trefflich, I., Marschall, H.-U., di Giuseppe, R., Ståhlman, M., Michalsen, A., Lampen, A. et al. (2019) Associations between dietary patterns and bile acids—results from a cross-sectional study in vegans and omnivores. *Nutrients* **12**, 47, <https://doi.org/10.3390/nu12010047>
- 146 Thorning, T.K., Raziani, F., Bendtsen, N.T., Astrup, A., Tholstrup, T. and Raben, A. (2015) Diets with high-fat cheese, high-fat meat, or carbohydrate on cardiovascular risk markers in overweight postmenopausal women: a randomized crossover trial. *Am. J. Clin. Nutr.* **102**, 573–581, <https://doi.org/10.3945/ajcn.115.109116>
- 147 Ou, J., Carbonero, F., Zoetendal, E.G., DeLany, J.P., Wang, M., Newton, K. et al. (2013) Diet, microbiota, and microbial metabolites in colon cancer risk in rural Africans and African Americans. *Am. J. Clin. Nutr.* **98**, 111–120, <https://doi.org/10.3945/ajcn.112.056689>
- 148 O’Keefe, S.J.D., Li, J.V., Lahti, L., Ou, J., Carbonero, F., Mohammed, K. et al. (2015) Fat, fibre and cancer risk in African Americans and rural Africans. *Nat. Commun.* **6**, 6342, <https://doi.org/10.1038/ncomms7342>
- 149 Wolf, P.G., Byrd, D.A., Cares, K., Dai, H., Odoms-Young, A., Gaskins, H.R. et al. (2022) Bile acids, gut microbes, and the neighborhood food environment—a potential driver of colorectal cancer health disparities. *MSystems* **7**, e0117421, <https://doi.org/10.1128/msystems.01174-21>
- 150 Fu, Z.D. and Klaassen, C.D. (2013) Increased bile acids in enterohepatic circulation by short-term calorie restriction in male mice. *Toxicol. Appl. Pharmacol.* **273**, 680–690, <https://doi.org/10.1016/j.taap.2013.10.020>
- 151 von Schwartzberg, R.J., Bisanz, J.E., Lyalina, S., Spanogiannopoulos, P., Ang, Q.Y., Cai, J. et al. (2021) Caloric restriction disrupts the microbiota and colonization resistance. *Nature* **595**, 272–277, <https://doi.org/10.1038/s41586-021-03663-4>
- 152 Heianza, Y., Zhou, T., He, H., Rood, J., Clish, C.B., Bray, G.A. et al. (2022) Changes in bile acid subtypes and long-term successful weight-loss in response to weight-loss diets: The POUNDS lost trial. *Liver Int.* **42**, 363–373, <https://doi.org/10.1111/liv.15098>
- 153 Straniero, S., Rosqvist, F., Edholm, D., Ahlström, H., Kullberg, J., Sundbom, M. et al. (2017) Acute caloric restriction counteracts hepatic bile acid and cholesterol deficiency in morbid obesity. *J. Intern. Med.* **281**, 507–517, <https://doi.org/10.1111/joim.12599>
- 154 Duez, H., van der Veen, J.N., Duhem, C., Pourcet, B., Touvier, T., Fontaine, C. et al. (2008) Regulation of bile acid synthesis by the nuclear receptor Rev-erb $\alpha$ . *Gastroenterology* **135**, <https://doi.org/10.1053/j.gastro.2008.05.035>

- 155 Qi, Y., Jiang, C., Cheng, J., Krausz, K.W., Li, T., Ferrell, J.M. et al. (2015) Bile acid signaling in lipid metabolism: metabolomic and lipidomic analysis of lipid and bile acid markers linked to anti-obesity and anti-diabetes in mice. *Biochim. Biophys. Acta - Mol. Cell Biol. Lipids* **1851**, 19–29, <https://doi.org/10.1016/j.bbalip.2014.04.008>
- 156 Stroeve, J.H.M., Brufau, G., Stellaard, F., Gonzalez, F.J., Staels, B. and Kuipers, F. (2010) Intestinal FXR-mediated FGF15 production contributes to diurnal control of hepatic bile acid synthesis in mice. *Lab. Invest.* **90**, 1457–1467, <https://doi.org/10.1038/labinvest.2010.107>
- 157 Han, S., Zhang, R., Jain, R., Shi, H., Zhang, L., Zhou, G. et al. (2015) Circadian control of bile acid synthesis by a KLF15-Fgf15 axis. *Nat. Commun.* **6**, 2–10, <https://doi.org/10.1038/ncomms8231>
- 158 Ferrell, J.M. and Chiang, J.Y.L. (2015) Short-term circadian disruption impairs bile acid and lipid homeostasis in mice. *Cmgh* **1**, 664–677, <https://doi.org/10.1016/j.jcmgh.2015.08.003>
- 159 Thompson, R.S., Gaffney, M., Hopkins, S., Kelley, T., Gonzalez, A., Bowers, S.J. et al. (2021) Ruminiclostridium 5, Parabacteroides distasonis, and bile acid profile are modulated by prebiotic diet and associate with facilitated sleep/clock realignment after chronic disruption of rhythms. *Brain Behav. Immun.* **97**, 150–166, <https://doi.org/10.1016/j.bbi.2021.07.006>
- 160 Evangelakos, I., Schwinge, D., Worthmann, A., John, C., Roeder, N., Pertzborn, P. et al. (2021) Oxysterol 7- $\alpha$  hydroxylase (CYP7B1) attenuates metabolic-associated fatty liver disease in mice at thermoneutrality. *Cells* **10**, 2656, <https://doi.org/10.3390/cells10102656>
- 161 Evangelakos, I., Kuhl, A., Baguhl, M., Schlein, C., John, C., Rohde, J.K. et al. (2022) Cold-induced lipoprotein clearance in Cyp7b1-deficient mice. *Front. Cell Dev. Biol.* **10**, 1–11, <https://doi.org/10.3389/fcell.2022.836741>
- 162 Worthmann, A., John, C., Rühlemann, M.C., Baguhl, M., Heinsen, F.A., Schaltenberg, N. et al. (2017) Cold-induced conversion of cholesterol to bile acids in mice shapes the gut microbiome and promotes adaptive thermogenesis. *Nat. Med.* **23**, 839–849, <https://doi.org/10.1038/nm.4357>
- 163 Ziętak, M., Kovatcheva-Datchary, P., Markiewicz, L.H., Ståhlman, M., Kozak, L.P. and Bäckhed, F. (2016) Altered microbiota contributes to reduced diet-induced obesity upon cold exposure. *Cell Metab.* **23**, 1216–1223, <https://doi.org/10.1016/j.cmet.2016.05.001>
- 164 O'Flaherty, S., Briner Crawley, A., Theriot, C.M. and Barrangou, R. (2018) The Lactobacillus bile salt hydrolase repertoire reveals niche-specific adaptation. *MSphere* **3**, 333–345, <https://doi.org/10.1128/mSphere.00140-18>
- 165 Meissner, M., Havinga, R., Boverhof, R., Kema, I., Groen, A.K. and Kuipers, F. (2010) Exercise enhances whole-body cholesterol turnover in mice. *Med. Sci. Sports Exerc.* **42**, 1460–1468, <https://doi.org/10.1249/MSS.0b013e3181cfc602>
- 166 Meissner, M., Lombardo, E., Havinga, R., Tietge, U.J.F., Kuipers, F. and Groen, A.K. (2011) Voluntary wheel running increases bile acid as well as cholesterol excretion and decreases atherosclerosis in hypercholesterolemic mice. *Atherosclerosis* **218**, 323–329, <https://doi.org/10.1016/j.atherosclerosis.2011.06.040>
- 167 Pinto, P.R., Rocco, D.D.F.M., Okuda, L.S., Machado-Lima, A., Castilho, G., Da Silva, K.S. et al. (2015) Aerobic exercise training enhances the in vivo cholesterol trafficking from macrophages to the liver independently of changes in the expression of genes involved in lipid flux in macrophages and aorta. *Lipids Health Dis* **14**, 1–12, <https://doi.org/10.1186/s12944-015-0093-3>
- 168 Morville, T., Sahl, R.E., Trammell, S.A., Svenningsen, J.S., Gillum, M.P., Helge, J.W. et al. (2018) Divergent effects of resistance and endurance exercise on plasma bile acids, FGF19, and FGF21 in humans. *JCI Insight* **3**, 1–12, <https://doi.org/10.1172/jci.insight.122737>
- 169 Chen, J., Zheng, M., Liu, J., Luo, Y., Yang, W., Yang, J. et al. (2019) Ratio of conjugated chenodeoxycholic to muricholic acids is associated with severity of nonalcoholic steatohepatitis. *Obesity* **27**, 2055–2066, <https://doi.org/10.1002/oby.22627>
- 170 Jiao, N., Baker, S.S., Chapa-Rodriguez, A., Liu, W., Nugent, C.A., Tsompana, M. et al. (2018) Suppressed hepatic bile acid signalling despite elevated production of primary and secondary bile acids in NAFLD. *Gut* **67**, 1–11, <https://doi.org/10.1136/gutjnl-2017-314307>
- 171 Legry, V., Francque, S., Haas, J.T., Verrijken, A., Caron, S., Chávez-Talavera, O. et al. (2017) Bile acid alterations are associated with insulin resistance, but not with NASH, in obese subjects. *J. Clin. Endocrinol. Metab.* **102**, 3783–3794, <https://doi.org/10.1210/jc.2017-01397>
- 172 Lake, A.D., Novak, P., Shipkova, P., Aranibar, N., Robertson, D., Reily, M.D. et al. (2013) Decreased hepatotoxic bile acid composition and altered synthesis in progressive human nonalcoholic fatty liver disease. *Toxicol. Appl. Pharmacol.* **268**, 132–140, <https://doi.org/10.1016/j.taap.2013.01.022>
- 173 Min, H.K., Kapoor, A., Fuchs, M., Mirshahi, F., Zhou, H., Maher, J. et al. (2012) Increased hepatic synthesis and dysregulation of cholesterol metabolism is associated with the severity of nonalcoholic fatty liver disease. *Cell Metab.* **15**, 665–674, <https://doi.org/10.1016/j.cmet.2012.04.004>
- 174 Caballero, F., Fernández, A., De Lacy, A.M., Fernández-Checa, J.C., Caballería, J. and García-Ruiz, C. (2009) Enhanced free cholesterol, SREBP-2 and STAR expression in human NASH. *J Hepatol* **50**, 789–796
- 175 Ferslew, B.C., Xie, G., Johnston, C.K., Su, M., Stewart, P.W., Jia, W. et al. (2015) Altered bile acid metabolome in patients with nonalcoholic steatohepatitis. *Dig. Dis. Sci.* **60**, 3318–3328, <https://doi.org/10.1007/s10620-015-3776-8>
- 176 Mouzaki, M., Wang, A.Y., Bandsma, R., Comelli, E.M., Arendt, B.M., Zhang, L. et al. (2016) Bile acids and dysbiosis in non-alcoholic fatty liver disease. *PLoS ONE* **11**, 1–13, <https://doi.org/10.1371/journal.pone.0151829>
- 177 Yara, S., Ikegami, T., Miyazaki, T., Murakami, M., Iwamoto, J., Hirayama, T. et al. (2019) Circulating bile acid profiles in Japanese patients with NASH. *GastroHep* **1**, 302–310, <https://doi.org/10.1002/ygh2.374>
- 178 Nimer, N., Choucair, I., Wang, Z., Nemet, I., Li, L., Gukasyan, J. et al. (2021) Bile acids profile, histopathological indices and genetic variants for non-alcoholic fatty liver disease progression. *Metabolism* **116**, 154457, <https://doi.org/10.1016/j.metabol.2020.154457>
- 179 Grzych, G., Chávez-Talavera, O., Descat, A., Thuillier, D., Verrijken, A., Kouach, M. et al. (2021) NASH-related increases in plasma bile acid levels depend on insulin resistance. *JHEP Rep.* **3**, 100222, <https://doi.org/10.1016/j.jhepr.2020.100222>
- 180 Neuschwander-Tetri, B.A., Loomba, R., Sanyal, A.J., Lavine, J.E., Van Natta, M.L., Abdelmalek, M.F. et al. (2015) Farnesoid X nuclear receptor ligand obeticholic acid for non-cirrhotic, non-alcoholic steatohepatitis (FLINT): a multicentre, randomised, placebo-controlled trial. *Lancet* **385**, 956–965, [https://doi.org/10.1016/S0140-6736\(14\)61933-4](https://doi.org/10.1016/S0140-6736(14)61933-4)
- 181 Trauner, M. and Fuchs, C.D. (2022) Novel therapeutic targets for cholestatic and fatty liver disease. *Gut* **71**, 194–209, <https://doi.org/10.1136/gutjnl-2021-324305>

- 182 Aranha, M.M., Cortez-Pinto, H., Costa, A., Da Silva, I.B.M., Camilo, M.E., De Moura, M.C. et al. (2008) Bile acid levels are increased in the liver of patients with steatohepatitis. *Eur. J. Gastroenterol. Hepatol.* **20**, 519–525, <https://doi.org/10.1097/MEG.0b013e3282f4710a>
- 183 Song, Q. and Zhang, X. (2022) The role of gut-liver axis in gut microbiome dysbiosis associated NAFLD and NAFLD-HCC. *Biomedicines* **10**, 1–14, <https://doi.org/10.3390/biomedicines10030524>
- 184 Schwimmer, J.B., Johnson, J.S., Angeles, J.E., Behling, C., Belt, P.H., Borecki, I. et al. (2019) Microbiome signatures associated with steatohepatitis and moderate to severe fibrosis in children with nonalcoholic fatty liver disease. *Gastroenterology* **157**, 1109–1122, <https://doi.org/10.1053/j.gastro.2019.06.028>
- 185 Lee, G., You, H.J., Bajaj, J.S., Joo, S.K., Yu, J., Park, S. et al. (2020) Distinct signatures of gut microbiome and metabolites associated with significant fibrosis in non-obese NAFLD. *Nat. Commun.* **11**, 4982, <https://doi.org/10.1038/s41467-020-18754-5>
- 186 Ioannou, G.N. (2016) The role of cholesterol in the pathogenesis of NASH. *Trends Endocrinol. Metab.* **27**, 84–95, <https://doi.org/10.1016/j.tem.2015.11.008>
- 187 Li, D.K., Chaudhari, S.N., Lee, Y., Sojoodi, M., Adhikari, A.A., Zukerberg, L. et al. (2022) Inhibition of microbial deconjugation of micellar bile acids protects against intestinal permeability and liver injury. *Sci. Adv.* **2794**, eabo2794, <https://doi.org/10.1126/sciadv.abo2794>
- 188 Zheng, X., Chen, T., Jiang, R., Zhao, A., Wu, Q., Kuang, J. et al. (2021) Hyocholic acid species improve glucose homeostasis through a distinct TGR5 and FXR signaling mechanism. *Cell Metab.* **33**, 791.e7–803.e7, <https://doi.org/10.1016/j.cmet.2020.11.017>
- 189 Li, X., Wang, Y., Xing, Y., Xing, R., Liu, Y. and Xu, Y. (2020) Changes of gut microbiota during silybin-mediated treatment of high-fat diet-induced non-alcoholic fatty liver disease in mice. *Hepatol. Res.* **50**, 5–14, <https://doi.org/10.1111/hepr.13444>
- 190 Newsome, P.N., Palmer, M., Freilich, B., Sheikh, M.Y., Sheikh, A., Sarles, H. et al. (2020) Volixibat in adults with non-alcoholic steatohepatitis: 24-week interim analysis from a randomized, phase II study. *J. Hepatol.* **73**, 231–240, <https://doi.org/10.1016/j.jhep.2020.03.024>
- 191 Potthoff, M.J., Potts, A., He, T., Duarte, J.A.G., Taussig, R., Mangelsdorf, D.J. et al. (2013) Colesevelam suppresses hepatic glycogenolysis by TGR5-mediated induction of GLP-1 action in DIO mice. *Am. J. Physiol. - Gastrointest Liver Physiol.* **304**, G371–80, <https://doi.org/10.1152/ajpgi.00400.2012>
- 192 Harach, T., Pols, T.W.H., Nomura, M., Maida, A., Watanabe, M., Auwerx, J. et al. (2012) TGR5 potentiates GLP-1 secretion in response to anionic exchange resins. *Sci. Rep.* **2**, 430, <https://doi.org/10.1038/srep00430>
- 193 Taniai, M., Hashimoto, E., Tobari, M., Yatsuji, S., Haruta, I., Tokushige, K. et al. (2009) Treatment of nonalcoholic steatohepatitis with colestimide. *Hepatol. Res.* **39**, 685–693, <https://doi.org/10.1111/j.1872-034X.2009.00507.x>
- 194 Le, T.A., Chen, J., Changchien, C., Peterson, M.R., Kono, Y., Patton, H. et al. (2012) Effect of colestevlam on liver fat quantified by magnetic resonance in nonalcoholic steatohepatitis: A randomized controlled trial. *Hepatology* **56**, 922–932, <https://doi.org/10.1002/hep.25731>
- 195 Donkers, J.M., Kooijman, S., Slijepcevic, D., Kunst, R.F., Roscam Abbing, R.L.P., Haazen, L. et al. (2019) NTCP deficiency in mice protects against obesity and hepatosteatosis. *JCI Insight* **4**, 1–11, <https://doi.org/10.1172/jci.insight.127197>
